# Two Isoforms of the Guanine Nucleotide Exchange Factor, Daple/CCDC88C Cooperate as Tumor Suppressors

Ying Dunkel<sup>1¶</sup>, Jason Ear<sup>2</sup>, Yash Mittal<sup>1</sup>, Blaze B. C. Lim<sup>1</sup>, Lawrence Liu<sup>1</sup>, Magda K. Holda<sup>1</sup>,  
Ulrich Nitsche<sup>3</sup>, Jorge Barbazán<sup>4</sup>, Ajay Goel<sup>5</sup>, Klaus-Peter Janssen<sup>3</sup>, Nicolas Aznar<sup>1, 6¶§</sup>, and  
Pradipta Ghosh<sup>1, 2, 7§</sup>

<sup>1</sup>*Department of Medicine, University of California, San Diego, La Jolla, California, USA.*

<sup>2</sup>*Department of Cellular and Molecular Medicine, University of California, San Diego, La Jolla, California, USA.*

<sup>3</sup>*Department of Surgery, Klinikum rechts der Isar, Technische Universität München, Munich, Germany.*

<sup>4</sup>*Translational Medical Oncology Laboratory, Health Research Institute of Santiago (IDIS), SERGAS, Santiago de Compostela, Spain.*

<sup>5</sup>*Division of Gastroenterology, Department of Internal Medicine and Charles A. Sammons Cancer Center and Baylor Research Institute, Baylor University Medical Center, Dallas, Texas, USA.*

<sup>6</sup>*Department of Cancer Cell Plasticity, Team Development Cancer and Stem Cells, Cancer Research Center of Lyon, Centre Léon Bérard, Lyon, France.*

<sup>7</sup>*Moore's Cancer Center, University of California, San Diego, La Jolla, California, USA.*

**Running Title:** Two Daple isoforms cooperatively suppress tumorigenesis

**Key Words:** G protein, Wnt, Frizzled, ccdc88c/DAPLE,  $\beta$ Catenin, Disheveled, PI3-Kinase, Akt, Rac1, Colon cancer.

¶ These authors contributed equally to this work.

§ **To whom correspondence should be addressed:** § Corresponding author. Email: [naznar@ucsd.edu](mailto:naznar@ucsd.edu) (N.A.), [prghosh@ucsd.edu](mailto:prghosh@ucsd.edu) (P.G.).

**Nicolas Aznar, Ph.D.**, CRCN, Department of Cancer Cell Plasticity, Team Development Cancer and Stem Cells, Cancer Research Center of Lyon (CRCL), Centre Léon Bérard (CLB), 28, rue Laënnec 69373 Lyon Cedex 08, France.

**Pradipta Ghosh, M.D.**; Professor, Departments of Medicine and Cellular and Molecular Medicine, University of California, San Diego School of Medicine; George E. Palade Laboratories for Cellular and Molecular Medicine, 9500 Gilman Drive, Room 333; La Jolla, California 92093-0651. Tel: 858-822-7633; Fax: 858-822-7636.

34 **ABSTRACT [150 words]**

35 Previously Aznar et al., showed that Daple enables Wnt/Frizzled receptors to transactivate  
36 trimeric G proteins during non-canonical Wnt signaling via a novel G-protein binding and  
37 activating (GBA) motif. By doing so, Daple serves as a double-edged sword; earlier during  
38 oncogenesis it suppresses neoplastic transformation and tumor growth, but later it triggers  
39 epithelial mesenchymal transition (EMT). We have identified and characterized two isoforms of  
40 the human Daple/CCDC88c gene. While both isoforms cooperatively suppress tumor growth via  
41 their GBA motif, only the full-length transcript triggers EMT and invasion. Aspirin suppresses the  
42 full-length transcript and protein but upregulates the short isoform. Both isoforms are  
43 suppressed during colon cancer progression, and their reduced expression carries additive  
44 prognostic significance. These findings provide insights into the opposing roles of Daple during  
45 cancer progression and define the G protein regulatory GBA motif as one of the minimal  
46 modules essential for Daple's role as a tumor suppressor.

47  
48  
49  
50  
51  
52  
53  
54  
55  
56  
57  
58  
59  
60  
61  
62  
63  
64  
65  
66  
67  
68  
69

## 70 Introduction

71  
72 Earlier we defined a novel paradigm in Wnt signaling in which Frizzled receptors (FZDRs)  
73 activate the G proteins and trigger non-canonical Wnt signaling via Daple (CCDC88C) ([Aznar et](#)  
74 [al., 2015a](#)). Daple, a multimodular signal transducer and a cytosolic protein was originally  
75 discovered as a Dishevelled (Dvl)-binding protein that regulates Wnt signaling ([Kobayashi et al.,](#)  
76 [2005](#); [Oshita et al., 2003](#)). Subsequent work showed that Daple directly binds ligand-activated  
77 FZDs, and serves as a guanine-nucleotide exchange factor (GEF) that activates the G protein,  
78 Gai ([Aznar et al., 2015a](#)). Binding to the G protein is mediated via Daple's C-terminally located  
79 G $\alpha$ -binding and activating (GBA) motif; such binding triggers non-canonical activation of Gai  
80 ([Aznar et al., 2015a](#)). Binding to FZDR is also brought on via a C-terminally located stretch  
81 distal to the GBA motif. Upon ligand stimulation, Daple-GEF dissociates from Dvl, binds and  
82 displaces Dvl from FZDs, and assembles Daple-Gai complexes. How Daple:Dvl complexes are  
83 disassembled was unknown until recently when we demonstrated that phosphorylation of  
84 Daple's PDZ-binding motif (PBM) by both receptor and non-receptor tyrosine kinases can  
85 trigger this change ([Aznar et al., 2018](#)). Disassembly of Daple:Dvl complexes and formation of  
86 FZD:Daple:Gai complexes facilitates the activation of trimeric Gai near ligand-activated FZDs.  
87 Daple activates Gai within the FZD:Daple:Gai complexes; such non-canonical activation of Gai  
88 by Daple-GEF suppresses cAMP, whereas released 'free' G $\beta\gamma$  heterodimers enhance Rac1 and  
89 PI3K-Akt signals ([Aznar et al., 2015a](#)). Although Daple-dependent enhancement of non-  
90 canonical Wnt signals can suppress tumor growth ([Aznar et al., 2015a](#)), it can also fuel EMT,  
91 trigger cancer cell migration and invasion ([Aznar et al., 2015a](#); [Ishida-Takagishi et al., 2012](#)) and  
92 drive metastasis ([Niavarani et al., 2016](#)). Furthermore, elevated expression of Daple-GEF in  
93 circulating tumor cells prognosticates a poor outcome ([Barbazan et al., 2016](#)). In doing so,  
94 Daple behaves like a double-edged sword-- a tumor suppressor early during oncogenesis which  
95 mimics an oncogene and fuels metastatic invasion later.

96 Here we identified a novel Daple isoform (Daple-V2) which corresponds only to the C-  
97 terminal region of full length Daple (Daple-fl; RefSeq). We demonstrate that Daple-V2  
98 possesses all the functional domains to bind Dvl, FZDR and Gai and represents the smallest  
99 autonomous Daple unit able to inhibit the  $\beta$ -catenin/TCF/LEF pathway and suppress tumor cell  
100 growth. We also demonstrate that, both isoforms have different subcellular distribution, and  
101 unlike Daple-fl, Daple-V2 does not enhance tumor cell invasiveness and therefore, is a more  
102 potent tumor suppressor and a better prognostic marker.

103

## 104 Results and Discussion

105

### 106 **Daple-V2 represents the smallest autonomous Daple unit able to bind Dvl, FZD7R and** 107 **Gai—**

108 We noted that there are 5 other transcript variants catalogued in Ensembl and UniProt  
109 databases, all predicted to code proteins: V2 (552aa), V3 (502aa), V4 (478aa), V5 (96aa) and  
110 V6 (88aa) (**Fig 1A**). Among them, V2, V3 and V4 are predicted to encode stretches within  
111 Daple's C-terminus, whereas V5 and V6 are predicted to encode stretches within Daple's N-  
112 terminus. Because distinct protein isoforms generated from single genes are known to  
113 contribute to the diversity of the proteome ([Larochele, 2016](#)), we asked if Daple's seemingly  
114 opposing and bifaceted roles in cancers may be, in part, due to the functions of two isoforms of  
115 the same protein. We focused on the 2 variants of Daple transcript (Daple-V2 and -V3) (**Fig 1**);  
116 both represent the last 5 exons of Daple-fl and, if translated, we noted that both isoforms should  
117 contain both a functional GBA motif and a C-terminal PBM motif (**Fig 1A, B; Fig 1- Figure**  
118 **Supplement 1A-B**). We noted that Daple-V2 and V3 differs from Daple-fl by a unique 5' end  
119 (**Fig 1B; Fig 1- Figure Supplement 1B**) which adds a unique sequence comprised of 5 amino  
120 acids (MSVLS) on the N-terminus of the isoform. To analyze if either of the transcripts are  
121 expressed, first we amplified Daple cDNA from HeLa cells using reverse transcription-PCR (RT-  
122 PCR) with specific Daple primers that can detect Daple-V2 (552aa) and -V3 (506aa) short  
123 isoforms (see *Materials and Methods*). Indeed two new transcripts were amplified (see **Fig 1-**  
124 **Figure Supplement 2**). By cloning the products into pcDNA3.1 vector and sequence analyses  
125 we confirmed that the most abundant isoform in human cells and colonic tissues is Daple-V2.

126 Because Daple expression is dysregulated during the progression of colon cancer  
127 ([Aznar et al., 2015a](#)), we first asked if mRNA and protein for both isoforms are expressed in the  
128 normal colon, and if so, what might be their relative abundance in normal colon. When we  
129 analyzed the copy numbers of Daple-V2 mRNA in 14 colon samples by qPCR, we found the  
130 relative abundance of Daple-V2 to be ~20% of that of Daple-fl (**Fig 1C**). We also confirmed the  
131 expression of Daple-V2 protein (**Fig 1D**) by analyzing lysates of mucosal biopsies taken from  
132 normal colons by immunoblotting using an anti-Daple-CT antibody raised against aa 1660-2028  
133 [previously validated in ([Aznar et al., 2015a](#))] and expected to detect both Daple-fl and -V2  
134 isoforms].

135 To study the properties of Daple-V2 and compare them with the previously described  
136 full-length protein, we cloned the Daple-V2 transcript into a myc-pcDNA vector plasmid for  
137 mammalian expression as a N-terminally myc-tagged protein, just as we did previously for

138 Daple-fl ([Aznar et al., 2015a](#)). As expected, we confirmed by GST pulldown assays that myc-  
139 Daple-V2 interacts with Gai3, PDZ domain of Dvl and the cytoplasmic tail of FZDR7 (**Fig 1E-G**).  
140 These findings indicate that Daple-V2 represents the smallest autonomous Daple unit  
141 possessing all the biochemical features of Daple-fl previously described ([Aznar et al., 2015a](#)).

142  
143 **Daple-V2 antagonizes Wnt signaling via the  $\beta$ -Catenin/TCF/LEF pathway, suppresses**  
144 **growth and proliferation but does not trigger EMT or cell invasion—**

145 We previously demonstrated that Daple-fl and more specifically its GBA motif, antagonizes the  
146  $\beta$ -catenin-dependent Wnt signaling pathway and inhibits colony growth, but enhances the PI3K-  
147 Akt and Rac1 signals, EMT and invasion ([Aznar et al., 2015a](#)). Because Daple-V2 possesses a  
148 GBA motif, and because the motif is required for binding G proteins, we asked if this motif is  
149 functional in cells. Using DLD1 colon cancer cells stably 7-TGP (**Fig 2A**), an eGFP expressing  
150 Wnt activity reporter construct, or parental DLD1 cells (**Fig 2B**), we generated stable cell lines  
151 expressing Daple-V2 wild-type (WT) and GEF-deficient (F194A; FA) mutant. For comparison,  
152 we used previously developed and characterized ([Aznar et al., 2015a](#)) DLD1 lines expressing  
153 the WT Daple-fl.

154 We found that Daple-V2 and Daple-fl have two similarities and one dissimilarity. First  
155 similarity was that both Daple-fl and Daple-V2 antagonize the  $\beta$ -catenin/TCF/LEF pathway (**Fig**  
156 **2C**); Daple-V2-WT, but not Daple-V2-FA failed to inhibit eGFP expression (**Fig 2A, D**),  
157 indicating that the inhibitory effect of Daple-V2 on the canonical Wnt pathway required an intact  
158 GBA motif. Consistently, both Daple-fl and Daple-V2 reduced the transcription of downstream  
159 target genes Axin-2 and SFRP-1; once again, the presence of an intact GBA motif was critical  
160 for such inhibition (**Fig 2E-F**). Second similarity was that expression of either Daple-fl or Daple-  
161 V2 inhibited anchorage-dependent colony growth of DLD1 cells by ~50% and 90% respectively  
162 (**Fig 2G-H**). Such growth suppressive effect required an intact GBA motif because, compared to  
163 Daple-V2 WT, expression of the GBA-deficient F1675A ([Aznar et al., 2015a](#); henceforth, FA)  
164 mutant not only failed to inhibit cell colony formation, but also enhanced anchorage-dependent  
165 growth (**Fig 2I-J**).

166 The dissimilarity between Daple-fl and Daple-V2 was observed in their ability to trigger  
167 EMT-- compared to cells expressing Daple-V2 or Daple-fl FA, those expressing Daple- fl WT  
168 had significantly higher expression of Lox-L3 and Vimentin, two genes commonly associated  
169 with epithelial-mesenchymal transition (EMT) (**Fig 2K-L**). Furthermore, in 3-D matrigel invasion  
170 assays using the transformed NIH3T3 cells exactly as done previously ([Aznar et al., 2015a](#)).  
171 Enhanced invasion, as determined by the area of invasion was detected exclusively in the

172 presence of Daple-fl WT, but not in cells expressing Daple-V2 or Daple-fl FA, indicating that  
173 only Daple-fl can trigger cell invasion (**Fig. 2M-N**). We found that expression of Daple-fl, but not  
174 Daple-V2 is increased in the invading margins of tumors compared to the non-invasive tumor  
175 cores (**Fig 2O-P**), which is in keeping with our findings that Daple-V2 does not contribute to  
176 EMT or higher invasiveness. These findings demonstrate that compared to Daple-fl, Daple-V2  
177 serves as a more potent inhibitor of the  $\beta$ -Catenin-dependent canonical Wnt pathway and tumor  
178 growth in colonies, but it does not enhance EMT or invasion (**Fig 2Q**).

179

### 180 **The anti-proliferative roles of Daple-fl and Daple-V2 are additive; simultaneous** 181 **suppression of both transcripts in colon cancers carries poor prognosis—**

182 Because both Daple-fl and Daple-V2 suppress colony growth, we asked if such effects are  
183 additive. To investigate this, we carried out growth curve assessment and cell viability assays  
184 on HeLa cells lines that have been depleted of endogenous Daple by shRNA and stably  
185 expressing myc-Daple-fl or myc-Daple-V2 either alone, or together [**Fig 3A**; Daple-depleted  
186 HeLa lines have been extensively characterized using a variety of approaches ([Aznar et al.,](#)  
187 [2015a](#))]. In both assays we found that co-expression of Daple-fl and Daple-V2 isoforms  
188 suppressed cell growth and proliferation most effectively compared to either isoforms alone (**Fig**  
189 **3B-C**).

190 We previously showed that Daple-fl is downregulated earlier during cancer initiation (at  
191 the stage of polyp to cancer conversion), and that its expression at high levels carries a good  
192 prognosis in colorectal cancers (CRCs) ([Aznar et al., 2015a](#)). We also showed that levels of  
193 Daple-fl is increased later during metastatic progression and in circulating tumor cells (CTCs),  
194 and that its expression at high levels carries a worse prognosis. We asked if and how the  
195 expression of Daple-V2 changes during cancer progression in the colon and what, if any, may  
196 the prognostic impact of such changes. Once again, we found several similarities and one  
197 dissimilarity. Analysis by qPCR in 12 paired colorectal tumors and their adjacent normal tissue  
198 showed that, much like Daple-fl, the expression of Daple-V2 is decreased in CRCs (**Fig 3D**).  
199 When we analyzed a cohort of patients with Duke's Stage II CRCs, we found that tumors that  
200 express low Daple-V2 had a significantly higher incidence of oncogenic K-ras mutation (**Fig 3E**;  
201 **Table 1**); no such correlation was seen in the case of Daple-fl. Tumors that express low Daple-fl  
202 (**Fig 3F**) or low Daple-V2 (**Fig 3G**) or low levels of both isoforms (**Fig 3H**) have a higher  
203 frequency of progression to distant metastases. Kaplan-Meier analyses revealed that Daple-V2  
204 is a better prognosticator than Daple-fl (compare **Fig 3I-J** to **3K-L**) when used standalone to  
205 stratify risk for recurrence-free survival (RFS) and disease-specific survival (DSS). When

206 accounting for high vs low levels of both Daple isoforms, an additive prognostic impact was  
207 seen compared to each alone (**Fig 3M-N**). A correlation analysis showed that Daple-V2, but not  
208 Daple-fl negatively correlates with the marker for proliferative index of tumor cells Ki67 ([Ellis et](#)  
209 [al., 2017](#); [Niikura et al., 2012](#)), and positive correlation with the tumor suppressor SAM and  
210 SH3-Domain Containing 1 ([Martini et al., 2011](#); [Zeller et al., 2003](#)) (**Table 2**). Together with our  
211 findings on cell lines (growth curve, Wnt reporter and tumor cell colony formation assays) these  
212 analyses on patient tumors suggest that while both isoforms suppress tumor cell proliferation,  
213 Daple-V2 may be a more potent suppressor of tumor cell growth and proliferation than Daple-fl.  
214 These findings also define the profile of dysregulated Daple-fl and Daple-V2 expression during  
215 oncogenic progression in the colon: both isoforms are suppressed during colorectal cancer  
216 progression, and low expression levels of both isoforms alone or simultaneously exhibit  
217 decreased survival.

218 Finally, we previously discovered that high levels of expression of Daple in CTCs of  
219 patients with metastatic (Duke's Stage IV) CRCs is associated with poorer prognosis compared  
220 to those with low Daple in CTCs ([Barbazan et al., 2016](#)); high Daple is associated with higher  
221 tumor recurrence at distant sites and poorer survival. Here we asked how each isoform  
222 contributed to the prognostic impact using the same cohort. We found that Daple-fl, but not  
223 Daple-V2, expression is increased in disseminated tumor cells compare to healthy subjects (**Fig**  
224 **3- figure supplement 1A-B**). When we assessed their prognostic impact on survival, we found  
225 that although high expression of each isoform correlated with worse PFS (**Fig 3- figure**  
226 **supplement 1C, F**), only Daple-fl levels carried a prognostic impact for DSS and overall survival  
227 (OS) (**Fig 3- figure supplement 1D-E, G-H**). These findings are in keeping with our prior  
228 observations that pro-invasive and pro-EMT signatures are triggered exclusively by Daple-fl, but  
229 not Daple-V2 (**Fig 2M-Q**).

230 From these results we deduce that both Daple-fl and Daple-V2 cooperatively suppress  
231 tumor cell proliferation, that both transcripts are reduced during adenoma-to-carcinoma  
232 progression, and that the two isoforms have an additive prognostic impact, in that their reduced  
233 expression in tumors carries a poor prognosis. However, the two isoforms differ in their ability to  
234 trigger EMT and invasion; Daple-fl, but not Daple-V2 can support that.

235  
236 **Daple is downregulated during adenoma-to-carcinoma conversion; the chemopreventive**  
237 **drug, Aspirin, has a differential effect on each isoform--**

238 Next we asked if suppression of Daple-fl and Daple-V2 transcripts during adenoma-to-cancer  
239 progression is associated also with reduced Daple proteins. Using an antibody raised against

240 the C-terminus of Daple, which is identical between Daple-fl and Daple-V2, we confirmed that  
241 total Daple is expressed in the normal colon and in early and intermediate adenomas, but it is  
242 suppressed in advanced adenomas with villous features or high-grade dysplasia (**Fig 4A-B**). In  
243 cancers, ~60% expressed Daple, but ~40% did not.

244 Next we asked if levels of expression of Daple-fl and Daple-V2 change in response to  
245 Aspirin, a potent chemopreventive agent that cuts the risk of CRCs by half ([Thun et al., 1991](#);  
246 [Wunsch, 1998](#)). We found that treatment of DLD1 cells with low-dose Aspirin reduces both  
247 mRNA (**Fig 4C**) and protein (**Fig 4D**) for Daple-fl, which has both tumor-suppressive and pro-  
248 metastatic properties. By contrast, Aspirin increased the mRNA and protein for Daple-V2 (**Fig**  
249 **4C-D**), which has only tumor-suppressive properties. Whether these observed changes in Daple  
250 isoforms are due to Aspirin's ability to inhibit cyclo-oxygenase-II (COX2), i.e., COX2-dependent  
251 or independent mechanisms ([Goel et al., 2003](#); [Wunsch, 1998](#)) remain unknown. Regardless,  
252 what is clear is that these changes are consistent with Aspirin's ability to suppress polyp-to-  
253 cancer progression in the colon ([Barry et al., 2009](#); [Johnson et al., 2010](#)), as well as its ability to  
254 inhibit metastatic progression of advanced CRCs ([Elwood et al., 2016](#); [Guillem-Llobat et al.,](#)  
255 [2016](#); [Jones et al., 1999](#)).

256 Taken together, our findings support the following model (**Fig 4E**). While both Daple-fl  
257 and Daple-V2 isoforms serve as growth suppressors early during oncogenesis, only Daple-fl  
258 serves as a pro-metastatic protein later during cancer progression. While both are suppressed  
259 during the step of polyp-to-cancer conversion, only Daple-fl is induced later during cancer  
260 invasion and dissemination.

261

## 262 **Conclusions—**

263 The major discovery we report here is the identification and characterization of a novel  
264 physiologic isoform of Daple, Daple-V2, which appears to contain the minimal modules that  
265 enable Daple to antagonize canonical  $\beta$ -Catenin-dependent Wnt signals and inhibit tumor cell  
266 growth and proliferation. Both isoforms are reduced during polyp-to-cancer progression in the  
267 colon. Compared to Daple-fl, Daple-V2 appears to be a more potent tumor suppressor and a  
268 better prognostic marker in primary tumors.

269 What Daple-V2 lacks is the ability to trigger EMT and invasion, which is a feature unique  
270 to Daple-fl. Consistent with these findings, we also found that although both isoforms  
271 collaboratively suppress tumor cell growth, and have an additive prognostic impact, only Daple-  
272 fl is increased in invasive margins and in CTCs disseminated during metastatic progression.  
273 Because we previously showed that a functional GBA motif is essential for Daple-fl to trigger



274 EMT and invasion ([Aznar et al., 2015a](#)), findings we report here suggests that these functions  
275 require the coupling of Daple's C-terminal G protein regulatory functions to the functions of its  
276 N-terminal HOOK and coiled-coil domains, e.g., phosphoinositide (PI3P) binding and  
277 localization to the pericentriolar recycling endosomes ([Aznar et al., 2017](#)), or binding to the  
278 dynein-dynactin motor complex ([Redwine et al., 2017](#)).

279         Although it remains unknown how cells modulate the expression of each Daple isoform,  
280 our studies provided precious clues; cells responding to Aspirin suppressed Daple-fl transcript  
281 and protein but concomitantly increased Daple-V2. Based on the properties of each isoform, we  
282 conclude that such a tradeoff is expected to overall maximize the desirable tumor-suppressive  
283 effect of Daple without the undesirable pro-EMT and pro-invasive effects.

284         In conclusion, we have revealed one of perhaps many ways how expression of Daple  
285 and its functions are regulated in the colon. Our findings that Daple isoforms can be  
286 pharmacologically manipulated to selectively augment its tumor-suppressive functions, while  
287 suppressing its pro-metastatic functions raises hope that therapeutic strategies could be tailored  
288 to meet such goals.

289  
290  
291  
292  
293  
294  
295  
296  
297  
298  
299  
300  
301  
302  
303  
304  
305  
306  
307

308  
309  
310  
311  
312  
313  
314  
315  
316  
317  
318  
319  
320  
321  
  
322  
323  
324  
325  
326  
327  
328  
329  
330  
  
331  
  
332  
333  
334  
335  
336  
337  
338  
339  
340  
341  
342  
343

## **ACKNOWLEDGMENTS**

This work was supported by NIH grants CA100768, CA160911 and DK099226 (to P.G). P.G. was also supported by the American Cancer Society (ACS-IRG 70-002) and by the UC San Diego Moores Cancer Center. J.E was supported by a NCI/NIH-funded Cancer Biology, Informatics & Omics (CBIO) Training Program (T32 CA067754) and a Postdoctoral Fellowship, PF-18-101-01-CSM, from the American Cancer Society, Y.M was supported by the NIH Training Grant in Gastroenterology (T32DK0070202) and a Clinical and Translational Science Awards (CTSA) Program (TL1TR001443), and J.B. by a fellowship from the Spanish Ministry of Education, Culture and Sports (FPU, AP2009-5229). Other sources of funding include NIH R01CA72851 (to A.G), the German ministry of education and research (BMBF/m4 Biobank Alliance) and funds from the Kommission für klinische Forschung (to U.N and K.P-J).

## **AUTHOR CONTRIBUTIONS**

Y.D, N.A., J.E. and P.G designed, performed and analyzed most of the experiments in this work. N.A and Y.D carried out the biochemical and cell biological characterization studies comparing and contrasting the two Daple isoforms. Y.D., Y.M. and P.G carried out the IHC studies on FFPE patient tissues. U.N. and K-P.J. provided access to CRC Stage-II cohort and primary tumor-derived RNA and U.N. and Y.D generated and analyzed the data. J.B. and Y.D carried out the analyses of Daple in CTCs. A.G. provided access to adenomas, and contributed unpublished essential data or reagents. Y.D., N.A and P.G conceived the project and wrote the manuscript. P.G supervised and funded the project.

**COMPETING FINANCIAL INTERESTS:** The authors declare no competing financial interests.

344  
345  
346  
347  
348  
349  
350  
351  
352  
353  
354  
355  
356  
357  
358  
359  
360  
361  
362  
363  
364  
365  
366  
367  
368  
369  
370  
371  
372  
373  
374  
375  
376  
377  
378  
379  
380  
381  
382  
383  
384  
385  
386  
387  
388  
389  
390  
391  
392  
393  
394

## Materials and Methods

### **Reagents and Antibodies--**

Unless otherwise indicated, all reagents were of analytical grade and obtained from Sigma-Aldrich. Cell culture media were purchased from Invitrogen. All restriction endonucleases and Escherichia coli strain DH5 $\alpha$  were purchased from New England Biolabs. E. coli strain BL21 (DE3), phalloidin-Texas Red were purchased from Invitrogen. Genejuice transfection reagent was from Novagen. PfuUltra DNA polymerase was purchased from Stratagene. Recombinant Goat anti-rabbit and goat anti-mouse Alexa Fluor 680 or IRDye 800 F(ab')<sub>2</sub> used for immunoblotting were from Li-Cor Biosciences. Mouse anti- $\alpha$ tubulin and anti-actin were obtained from Sigma; anti-Myc was obtained from Covance, and anti-GFP from Santa Cruz Biotechnology. Rabbit anti-pan-G $\beta$  (M-14), and anti-Gai3 were obtained from Santa Cruz Biotechnology. Anti-Daple antibodies were generated in collaboration with Millipore using the C-terminus of Daple (aa 1660-2028) as an immunogen.

### **Plasmid Constructs and Mutagenesis--**

Cloning of N-terminally tagged myc-Daple-fl in pcDNA3.1(+) was carried out as described previously ([Aznar et al., 2015b](#)). The subsequent site-directed mutagenesis and truncated constructs (myc-Daple full length F1675A (FA) and deleted from aa 2025-2028( $\Delta$ PBM) were carried out on this template using Quick Change as per manufacturer's protocol. Cloning of N-terminally tagged myc-Daple-V2 was carried out by PCR cloning directly from myc-pcDNA3.1(+)-Daple-fl using primers containing 5' unique region (MSVLS) in Daple V2 sequence (corresponding to UniProtKB - Q9P219-2) and being inserted into myc-pcDNA 3.1(+) between Kpn-1/EcoR1. Daple-V2-FA (F169A) and Daple-V2-  $\Delta$ PBM (deleted from 549-552aa) were also directly cloned out from pcDNA3.1(+)-Daple-fl-FA and pcDNA3.1(+)-daple-fl- $\Delta$ PBM. Cloning of rat G $\alpha$ -proteins into pGEX-4T-1 GST-Gai3 has been described previously ([Garcia-Marcos et al., 2010](#); [Garcia-Marcos et al., 2009](#); [Garcia-Marcos et al., 2011b](#); [Ghosh et al., 2010](#); [Ghosh et al., 2008](#)). GST-tagged FZDR7-CT construct ([Yao et al., 2004](#)) was a generous gift from Ryoji Yao (JFCR research institute, Japan). GST-Dvl2-PDZ was from Raymond Habas (Temple University, Philadelphia, PA).

### **Protein Expression and Purification--**

GST, GST-Gai3, GST-PDZ and GST-FZDR7 fusion constructs were expressed in E. coli strain BL21 (DE3) (Invitrogen) and purified as described previously ([Garcia-Marcos et al., 2009](#); [Ghosh et al., 2010](#); [Ghosh et al., 2008](#)). Briefly, bacterial cultures were induced overnight at 25°C with 1 mM isopropyl  $\beta$ -D-1-thiogalactopyranoside (IPTG). Pelleted bacteria from 1L of culture were re-suspended in 10 ml GST-lysis buffer [25 mM Tris-HCl, pH 7.5, 20 mM NaCl, 1 mM EDTA, 20% (v:v) glycerol, 1% (v:v) Triton X-100, 2X protease inhibitor cocktail (Complete EDTA-free, Roche Diagnostics)]. After sonication (4 x 20s, 1 min between cycles), lysates were centrifuged at 12,000g at 4°C for 20 min. Except for GST-FZD (see *in vitro* GST pull-down assay section), solubilized proteins were affinity purified on glutathione-Sepharose 4B beads (GE Healthcare). Proteins were eluted, dialyzed overnight against PBS and stored at -80 °C.

395

### 396 **Cell Culture and the Rationale for Choice of Cells in Various Assays--**

397 Tissue culture was carried out essentially as described before ([Garcia-Marcos et al., 2011a](#);  
398 [Ghosh et al., 2010](#); [Ghosh et al., 2008](#)). We used a total of 3 different cell lines in this work,  
399 each chosen carefully based on its level of endogenous Daple expression and the type of  
400 assay. All these cell lines were cultured according to ATCC guidelines. Cos7 cells were  
401 primarily used for transient overexpression of tagged Daple protein and lysates of these cells  
402 were used as source of proteins in pulldown assays. We chose to carry out these assays in  
403 Cos7 cells because they are easily and efficiently transfected (> 90% efficiency) with most  
404 constructs. The added advantage is that they have no detectable endogenous Daple and  
405 provide a system to selectively analyze the properties of WT vs mutant Daple constructs without  
406 interference from endogenous Daple.

407 DLD1 were primarily used to study the effect of Daple on cancer cell growth properties  
408 (anchorage-dependent) and to assess the effect of Daple on the classical Wnt signaling  
409 pathway ( $\beta$ Catenin/TCF/LEF). There are several reasons why this cell line was chosen: 1) We  
410 focused on colorectal cancer in this study and DLD1 cells were appropriate to translate our  
411 findings because they are human colorectal cancer cells; 2) We determined that levels of Daple  
412 are significantly lower/undetectable (~ 10 fold) in these cells compared to normal colon (data not  
413 shown), thereby allowing us to reconstitute Daple expression exogenously and analyze the  
414 effect of various mutant Daple constructs without significant interference due to the endogenous  
415 protein; 3) These cells have been extensively characterized with respect to most oncogenes  
416 (ATCC database), and are highly tumorigenic in 2-D and 3-D cultures due to a mutation in  
417 KRAS (G13D) (Shirasawa et al., 1993; Ahmed et al., 2013); 4) They are a sensitive model to  
418 study how various manipulations of the noncanonical Wnt signaling pathway oppose the  
419 canonical Wnt pathway during tumor growth because they constitutively secrete Wnt ligands to  
420 maintain high levels of the canonical signaling ([Voloshanenko et al., 2013](#)) within the growth  
421 matrix. Production and secretion of endogenous ligands bypasses the need to add exogenous  
422 ligands repeatedly during prolonged assays that last ~2 weeks.

423 Low passage NIH3T3 fibroblasts were used exclusively in 3-D Matrigel invasion. The  
424 rationale for their use in invasion assay lies in the fact that non-transformed NIH3T3 fibroblasts  
425 are poorly invasive in vitro and non-tumorigenic and non-metastatic in animal studies ([Bondy et](#)  
426 [al., 1985](#); [Chambers et al., 1990](#); [Hill et al., 1988](#); [Tuck et al., 1991](#)). It is because of this reason,  
427 NIH3T3 cells are widely used to study proteins that can trigger a gain in invasive properties  
428 ([Leitner et al., 2011](#)). The rationale for using NIH3T3 in the above assays is further  
429 strengthened by the fact that they are highly transfectable (~80% transfection efficiency with  
430 myc-Daple) and express Daple at very low endogenous levels (as determined by  
431 immunoblotting and qPCR) compared to normal colonic epithelium. Such expression pattern  
432 allows us to study the effect of various mutant Daple constructs without significant interference  
433 due to the endogenous protein.

434

435

### 436 **Transfection; Generation of Stable Cell Lines and Cell Lysis--**

437 Transfection was carried out using Genejuice (Novagen) for DNA plasmids following the  
438 manufacturers' protocols. DLD1 cell lines stably expressing Daple constructs were selected  
439 after transfection in the presence of 800  $\mu$ g/ml G418 for 6 weeks. The resultant multiclonal pool  
440 was subsequently maintained in the presence of 500  $\mu$ g/ml G418. Daple expression was  
441 verified independently using anti-Daple antibody by immunoblotting, and estimated to be ~5x  
442 the endogenous level.

443

### 444 **Quantitative Immunoblotting--**

445 For immunoblotting, protein samples were separated by SDS-PAGE and transferred to PVDF  
446 membranes (Millipore). Membranes were blocked with PBS supplemented with 5% non fat milk  
447 (or with 5% BSA when probing for phosphorylated proteins) before incubation with primary  
448 antibodies. Infrared imaging with two-color detection and band densitometry quantifications were  
449 performed using a Li-Cor Odyssey imaging system exactly as done previously ([Garcia-Marcos  
450 et al., 2011a](#); [Garcia-Marcos et al., 2010](#); [Garcia-Marcos et al., 2012](#); [Garcia-Marcos et al.,  
451 2011b](#); [Ghosh et al., 2010](#)). All Odyssey images were processed using Image J software (NIH)  
452 and assembled into figure panels using Photoshop and Illustrator software (Adobe).

453  
454

#### 455 ***In vitro GST pulldown --***

456 Purified GST alone, GST-Gai3 or GST-PDZ (5 µg) were immobilized on glutathione-Sepharose  
457 beads and incubated with binding buffer [50 mM Tris-HCl (pH 7.4), 100 mM NaCl, 0.4% (v:v)  
458 Nonidet P-40, 10 mM MgCl<sub>2</sub>, 5 mM EDTA, 30 µM GDP, 2 mM DTT, protease inhibitor mixture]  
459 for 90 min at room temperature as described before ([Garcia-Marcos et al., 2011a](#); [Ghosh et al.,  
460 2010](#); [Ghosh et al., 2008](#); [Lin et al., 2011](#)). Lysates (~250 µg) of Cos7 cells expressing  
461 appropriate myc-Daple-V2 constructs were added to each tube, and binding reactions were  
462 carried out for 4 h at 4°C with constant tumbling in binding buffer [50 mM Tris-HCl (pH 7.4), 100  
463 mM NaCl, 0.4% (v:v) Nonidet P-40, 10 mM MgCl<sub>2</sub>, 5 mM EDTA, 30 µM GDP, 2 mM DTT].  
464 Beads were washed (4x) with 1 mL of wash buffer [4.3 mM Na<sub>2</sub>HPO<sub>4</sub>, 1.4 mM KH<sub>2</sub>PO<sub>4</sub> (pH 7.4),  
465 137 mM NaCl, 2.7 mM KCl, 0.1% (v:v) Tween 20, 10 mM MgCl<sub>2</sub>, 5 mM EDTA, 30 µM GDP, 2  
466 mM DTT] and boiled in Laemmli's sample buffer. Immunoblot quantification was performed by  
467 infrared imaging following the manufacturer's protocols using an Odyssey imaging system (Li-  
468 Cor Biosciences).

469 GST-FZD7-CT construct was immobilized on glutathione-Sepharose beads directly from  
470 bacterial lysates by overnight incubation at 4°C with constant tumbling as described before  
471 ([Aznar et al., 2015b](#)). Next morning, GST-FZD7-CT immobilized on glutathione beads were  
472 washed and subsequently incubated with His-tagged Daple-CT or Gai3 proteins at 4°C with  
473 constant tumbling. Washes and immunoblotting were performed as previously.

474  
475

#### 476 ***β-Catenin Reporter Assays--***

477 These assays were carried out using the well-established reporter 7xTcf-eGFP(7TGP) ([Fuerer  
478 and Nusse, 2010](#)). Stable cells lines expressing this reporter were generated by lentiviral  
479 transduction and subsequent selection using standard procedures. Lentiviral infection and  
480 selection were performed according to standard procedures. Briefly, 10 cm plates DLD1 cells at  
481 70% confluency were incubated with media containing 8 µg/mL polybrene and 10 µl of lentivirus  
482 for 6 h. After 24 hours post infection, selection of puromycin-resistant clones was initiated by  
483 adding the antibiotic at 2 µg/ml final concentration. The resultant DLD1-7TGP stable cells were  
484 subsequently transfected with various myc-Daple V2 constructs and selected for G418  
485 resistance as described earlier in methods. The DLD1-7TGP cells stably expressing myc-Daple  
486 were incubated overnight at 0.2% FBS, analyzed by fluorescence microscopy, and  
487 photographed prior to lysis. Whole cell lysates samples were then boiled in Laemmli's sample  
488 buffer and GFP protein expression was monitored by immunoblotting. .

489  
490

#### 491 ***Anchorage-dependent Colony Growth Assay--***

492 Anchorage-dependent growth was monitored on solid (plastic) surface. Approximately ~1000  
493 DLD1 cells stably expressing various Daple constructs were plated in 6-well plates and  
494 incubated in 5% CO<sub>2</sub> at 37°C for ~2 weeks in 0.2% FBS growth media. Colonies were then

495 stained with 0.005% crystal violet for 1 h. The remaining DLD1 cells were lysed and analyzed by  
496 WB to confirm Daple construct expression. Each experiment was analyzed in triplicate.

497  
498

#### 499 ***Invasion Assays--***

500 NIH3T3 cell invasion assay in 3D culture was performed according to the manufacturer's  
501 protocol (Trevigen, Cultrex 3D Spheroid BME Cell Invasion Assay, catalog # 3500-096-K).  
502 Briefly, NIH3T3 cells (3000 cells) transfected with empty vector (control) or myc-Daple  
503 constructs were incubated first in the Spheroid Formation extracellular matrix (ECM) containing  
504 0.2% FBS for 3 days. Invasion matrix was then added and layered on top with media containing  
505 FBS. Serum-triggered cell invasion was photographed under light microscope everyday for 10  
506 days and fresh media (FBS concentration is increased each time in order to maintain a  
507 gradient) was replenished every 48 h. Photographs were analyzed and pseudocolored by  
508 Image J to reflect cell density.

509

#### 510 ***Patient cohort for mRNA analysis--***

511 The ethics committee of the Klinikumrechts der Isar, Munich, Germany, approved collection of  
512 the patient samples (#1926/07, and #5428/12). All samples were obtained after prior informed  
513 written consent. Tumor tissue from 173 patients with histopathologically confirmed stage II  
514 (AJCC/UICC) colon cancer who underwent complete surgical resection (R0) between 1987 and  
515 2006 was obtained, by a pathologist immediately after surgical resection. Specimens were  
516 transferred into liquid nitrogen and stored at -80°C until further processing. None of the patients  
517 received neoadjuvant treatment. No metachronous tumors were found in the colon or rectum.  
518 As reported previously in detail, clinical data and post-operative follow-up was collected for all  
519 patients; moreover, DNA was isolated for KRAS and BRAF mutation analysis, as well as  
520 microsatellite instability testing ([Nitsche et al., 2012](#)). Total mRNA was extracted by standard  
521 procedures (Qiagen, Hilden, Germany), after histology guided sample selection to ensure a  
522 tumor cell content of >50%, and transcribed to cDNA as described in detail earlier, for  
523 expression analysis of DAPLE ([Nitsche et al., 2012](#)).

524

#### 525 ***RNA isolation, standard curve and quantitative PCR (qPCR)--***

526 Total RNA was isolated using an RNeasy kit (QIAGEN) as per the manufacturers' protocol.  
527 First-strand cDNA was synthesized using Superscript II reverse transcriptase (Invitrogen),  
528 followed by ribonuclease H treatment (Invitrogen) prior to performing quantitative real-time PCR.  
529 A standard curve, to quantify mRNA copy number, was constructed using larger PCR products  
530 (~700bp) that included the target sequence used in qPCR. Reactions omitting reverse  
531 transcriptase were performed in each experiment as negative controls. Reactions were then run  
532 on a real-time PCR system (ABI StepOnePlus; Applied Biosystems). Gene expression was  
533 detected with SYBR green/Taqman assay (Invitrogen), and relative gene expression was  
534 determined by normalizing to GAPDH using the comparative  $\Delta C_t$ /Relative standard curve  
535 method.

536

537 Primer and probe sequences are as listed below.

538

539 **Probes and primers used in Taqman assays:** for human tumor/tissue and CTC samples

540 GAPDH:

541 hGAPDH-fwd: 5'- CAGTTGTAGGCAAGCTGCGA -3'

542 hGAPDH-rev: 5'- TATGACAGGCCCGAAGCTTCT -3'

543 hGAPDH-probe: 5'- CCAAGCCTGAGGGCAAGGCTATAATAGATGAAT-3'

544 hGAPDH-standard fwd: 5'- GCT GTG ACA TCA GGG CAA T- 3'

545 hGAPDH-standard rev: 5' - GGC GGT GGT GGC TTT ATT T- 3'

546  
547 Daple-fl:  
548 hDaple-fl-fwd: 5'- CGGGACCTCACCAAGCAA -3'  
549 hDaple-fl -rev: 5'- CTGCTGAGCTGCTGGCTCTT -3'  
550 hDaple-fl - probe: 5'- CAACTCTGAGGGAGGACCTGGTGCTC -3'  
551 hDaple-fl-Standard-fwd: 5'- GGATGCAGTCTTGGACGATAG -3'  
552 hDaple-fl-Standard-rev: 5'- CTTCTTTCATGGCTAGTGTTGTTT -3'  
553  
554 Daple-V2:  
555 hDaple-V2-fwd: 5'- GGAGCCTCAGGATATACGTGCA -3'  
556 hDaple-V2-rev: 5'- TCAAGGCTGCCTCTGTGTGG -3'  
557 hDaple-V2-probe: 5'- CAGGATGTCCGTAAGCCCTGGGGATC -3'  
558 hDaple-V2 Standard-fwd: 5'- CACTCCCTGGACCATTCTT -3'  
559 hDaple-V2 Standard-rev: 5'- CTGTAGTGGTGGCTGAAGTT -3'

560  
561 **Primers used in SYBR-green assays:** for cell-based analyses

562 Lox-3:  
563 hq-LOXL3 fwd: 5'- ATGGGTGCTATCCACCTGAG -3'  
564 hq-LOXL3 rev: 5'- GAGTCGGATCCTGGTCTCTG -3'

565  
566 Axin-2:  
567 hAxin-2-fwd: 5'- GAGTGGACTTGTGCCGACTTCA -3'  
568 hAxin-2-rev: 5'- GGTGGCTGGTGCAAAGACATAG -3'

569  
570 Vimentin:  
571 hVim-fwd: 5'- AAGAGAACTTTGCCGTTGAA-3'  
572 hVim-rev: 5'-GTGATGCTGAGAAGTTTCGT-3'

573  
574 SFRP-1:  
575 hSFRP-1-fwd: 5'- GAGTTTGCCTGAGGATGAAAA -3'  
576 hSFRP-1-rev: 5'- GCTTCTTCTTCTTGGGGACA -3'

577  
578 GADPH:  
579 hGADPH q-fwd2: 5'- TCA GTT GTA GGC AAG CTG CGA CGT- 3'  
580 hGADPH q-rev2: 5'- AAGCCAGAGGCTGGTACCTAGAAC -3'

581  
582 DAPLE:  
583 hDaple-fl-fwd: 5'- TGA CAT GGA GAC CCT GAA GGC TGA -3'  
584 hDaple fl-rev2: 5'- TTTCATGCGGGCCTCACTGCTGA-3'  
585 hDaple V2- Fwd : 5'- GTT GTC ACA CTC CCT GGA CCA TTT C -3'  
586 hDaple V2-Rev: 5'- GCTTTGGTTTTAGATCCCCAGGGC -3'

587  
588  
589 **Patient cohort for IHC analysis**— Formalin-fixed paraffin embedded (FFPE) normal, polyp and  
590 cancer tissues used in this study were obtained from patients undergoing routine colonoscopies  
591 and provided by the section of Gastroenterology, VA San Diego Healthcare System. The  
592 protocol was approved by the Human Research Protection Program Institutional Review Board  
593 (protocol H130266).

594  
595 **Immunohistochemistry** —

596 Colon specimens of known histologic type were analyzed by IHC using a previously-validated  
597 anti-Daple-CT rabbit polyclonal antibody raised against Daple (aa 1660-2028) (1:50; Millipore  
598 Inc.). Briefly, formalin-fixed, paraffin-embedded tissue sections of 4  $\mu$ m thickness were cut and  
599 placed on glass slides coated with 3-aminopropyl triethoxysilane, followed by deparaffinization  
600 and hydration. Heat-induced epitope retrieval was performed using citrate buffer (pH 6) in a  
601 pressure cooker. Tissue sections were incubated with 3% hydrogen peroxidase for 15 min to  
602 block endogenous peroxidase activity, followed by incubation with primary antibodies overnight  
603 in a humidified chamber at 4°C. Immunostaining was visualized with a labeled streptavidin-biotin  
604 using 3,3'-diaminobenzidine as a chromogen and counterstained with hematoxylin. All the  
605 samples were first quantitatively analyzed and scored based on 2 independent criteria. First, the  
606 intensity of staining was scored on a scale of 0 to 3, where 0 = no staining, 1 = light brown, 2 =  
607 brown, and 3 = dark brown. Second, the percentage of the cells that stained positive in the  
608 tumor area was scored on a scale of 0 to 4, where 0 = 0, 1 =  $\leq 10\%$ , 2 = 11–50%, 3 = 51–75%,  
609 and 4 =  $>75\%$ . Subsequently, each tumor sample was assigned a final score, which is the  
610 product of its (intensity of staining)  $\times$  (% cells that stained positive). Tumors were categorized as  
611 negative when their final score was  $<3$  and as positive when their final score was  $\geq 3$ .

612

### 613 **Statistical analyses--**

614 Statistical evaluation was performed using GraphPad Prism 5 software. Unless stated  
615 otherwise, statistical significance was determined using Student's *t* test. The associations  
616 between the expression level of Daple isoforms and K-ras mutation status and metastatic status  
617 of disease were investigated by Fisher's exact test. Parametric Pearson's correlation and  
618 nonparametric Spearman's correlation analysis were used to assess the relationship between  
619 the expression of Daple isoforms and patients' age, tumor size, differentiation and grading, the  
620 level of Ki67-Index, Osteopontin, SASH1, MACC1 and CEA. In order to derive optimal cut-off  
621 values of gene expression levels, maximally selected log-rank statistics performed by R  
622 Software version 2.15.0 ([Budczies et al., 2012](#)) were used. Time-dependent survival  
623 probabilities were estimated with the Kaplan-Meier method using the log-rank test. All statistical  
624 tests were performed two-sided, and *p*-values less than 0.05 were considered to be statistically  
625 significant.

626

627

628

629

630

631

632

633

634

635

636

637

638

639

640

641

642



643  
644  
645  
646  
647  
648  
649

## LITERATURE CITED

- 650 Aznar, N., J. Ear, Y. Dunkel, N. Sun, K. Satterfield, F. He, N.A. Kalogriopoulos, I. Lopez-  
651 Sanchez, M. Ghassemian, D. Sahoo, I. Kufareva, and P. Ghosh. 2018. Convergence of  
652 Wnt, growth factor, and heterotrimeric G protein signals on the guanine nucleotide  
653 exchange factor Daple. *Sci Signal*. 11.
- 654 Aznar, N., K.K. Midde, Y. Dunkel, I. Lopez-Sanchez, Y. Pavlova, A. Marivin, J. Barbazan, F.  
655 Murray, U. Nitsche, K.P. Janssen, K. Willert, A. Goel, M. Abal, M. Garcia-Marcos, and P.  
656 Ghosh. 2015a. Daple is a novel non-receptor GEF required for trimeric G protein  
657 activation in Wnt signaling. *Elife*. 4:e07091.
- 658 Aznar, N., K.K. Midde, Y. Dunkel, I. Lopez-Sanchez, Y. Pavlova, A. Marivin, J. Barbazan, F.  
659 Murray, U. Nitsche, K.P. Janssen, K. Willert, A. Goel, M. Abal, M. Garcia-Marcos, and P.  
660 Ghosh. 2015b. Daple is a novel non-receptor GEF required for trimeric G protein  
661 activation in Wnt signaling. *eLife*. 4.
- 662 Aznar, N., N. Sun, Y. Dunkel, J. Ear, M.D. Buschman, and P. Ghosh. 2017. A Daple-Akt feed-  
663 forward loop enhances noncanonical Wnt signals by compartmentalizing beta-catenin.  
664 *Mol Biol Cell*. 28:3709-3723.
- 665 Barbazan, J., Y. Dunkel, H. Li, U. Nitsche, K.P. Janssen, K. Messer, and P. Ghosh. 2016.  
666 Prognostic Impact of Modulators of G proteins in Circulating Tumor Cells from Patients  
667 with Metastatic Colorectal Cancer. *Sci Rep*. 6:22112.
- 668 Barry, E.L., L.B. Sansbury, M.V. Grau, I.U. Ali, S. Tsang, D.J. Munroe, D.J. Ahnen, R.S.  
669 Sandler, F. Saibil, J. Gui, R.S. Bresalier, G.E. McKeown-Eyssen, C. Burke, and J.A.  
670 Baron. 2009. Cyclooxygenase-2 polymorphisms, aspirin treatment, and risk for  
671 colorectal adenoma recurrence--data from a randomized clinical trial. *Cancer Epidemiol*  
672 *Biomarkers Prev*. 18:2726-2733.
- 673 Bondy, G.P., S. Wilson, and A.F. Chambers. 1985. Experimental metastatic ability of H-ras-  
674 transformed NIH3T3 cells. *Cancer research*. 45:6005-6009.
- 675 Budczies, J., F. Klauschen, B.V. Sinn, B. Gyorffy, W.D. Schmitt, S. Darb-Esfahani, and C.  
676 Denkert. 2012. Cutoff Finder: a comprehensive and straightforward Web application  
677 enabling rapid biomarker cutoff optimization. *PLoS one*. 7:e51862.
- 678 Chambers, A.F., G.H. Denhardt, and S.M. Wilson. 1990. ras-transformed NIH 3T3 cell lines,  
679 selected for metastatic ability in chick embryos, have increased proportions of p21-  
680 expressing cells and are metastatic in nude mice. *Invasion & metastasis*. 10:225-240.
- 681 Ellis, M.J., V.J. Suman, J. Hoog, R. Goncalves, S. Sanati, C.J. Creighton, K. DeSchryver, E.  
682 Crouch, A. Brink, M. Watson, J. Luo, Y. Tao, M. Barnes, M. Dowsett, G.T. Budd, E.  
683 Winer, P. Silverman, L. Esserman, L. Carey, C.X. Ma, G. Unzeitig, T. Pluard, P.  
684 Whitworth, G. Babiera, J.M. Guenther, Z. Dayao, D. Ota, M. Leitch, J.A. Olson, Jr., D.C.  
685 Allred, and K. Hunt. 2017. Ki67 Proliferation Index as a Tool for Chemotherapy  
686 Decisions During and After Neoadjuvant Aromatase Inhibitor Treatment of Breast

- 687 Cancer: Results From the American College of Surgeons Oncology Group Z1031 Trial  
688 (Alliance). *J Clin Oncol.* 35:1061-1069.
- 689 Elwood, P.C., G. Morgan, J.E. Pickering, J. Galante, A.L. Weightman, D. Morris, M. Kelson, and  
690 S. Dolwani. 2016. Aspirin in the Treatment of Cancer: Reductions in Metastatic Spread  
691 and in Mortality: A Systematic Review and Meta-Analyses of Published Studies. *PLoS*  
692 *one.* 11:e0152402.
- 693 Fuerer, C., and R. Nusse. 2010. Lentiviral vectors to probe and manipulate the Wnt signaling  
694 pathway. *PLoS one.* 5:e9370.
- 695 Garcia-Marcos, M., J. Ear, M.G. Farquhar, and P. Ghosh. 2011a. A GDI (AGS3) and a GEF  
696 (GIV) regulate autophagy by balancing G protein activity and growth factor signals. *Mol*  
697 *Biol Cell.* 22:673-686.
- 698 Garcia-Marcos, M., P. Ghosh, J. Ear, and M.G. Farquhar. 2010. A structural determinant that  
699 renders G alpha(i) sensitive to activation by GIV/girdin is required to promote cell  
700 migration. *J Biol Chem.* 285:12765-12777.
- 701 Garcia-Marcos, M., P. Ghosh, and M.G. Farquhar. 2009. GIV is a nonreceptor GEF for G alpha i  
702 with a unique motif that regulates Akt signaling. *Proc Natl Acad Sci U S A.* 106:3178-  
703 3183.
- 704 Garcia-Marcos, M., P.S. Kietsunthorn, Y. Pavlova, M.A. Adia, P. Ghosh, and M.G. Farquhar.  
705 2012. Functional characterization of the guanine nucleotide exchange factor (GEF) motif  
706 of GIV protein reveals a threshold effect in signaling. *Proc Natl Acad Sci U S A.*  
707 109:1961-1966.
- 708 Garcia-Marcos, M., P.S. Kietsunthorn, H. Wang, P. Ghosh, and M.G. Farquhar. 2011b. G  
709 Protein binding sites on Calnuc (nucleobindin 1) and NUCB2 (nucleobindin 2) define a  
710 new class of G(alpha)i-regulatory motifs. *J Biol Chem.* 286:28138-28149.
- 711 Ghosh, P., A.O. Beas, S.J. Bornheimer, M. Garcia-Marcos, E.P. Forry, C. Johannson, J. Ear,  
712 B.H. Jung, B. Cabrera, J.M. Carethers, and M.G. Farquhar. 2010. A G{alpha}i-GIV  
713 molecular complex binds epidermal growth factor receptor and determines whether cells  
714 migrate or proliferate. *Mol Biol Cell.* 21:2338-2354.
- 715 Ghosh, P., M. Garcia-Marcos, S.J. Bornheimer, and M.G. Farquhar. 2008. Activation of  
716 Galphai3 triggers cell migration via regulation of GIV. *J Cell Biol.* 182:381-393.
- 717 Goel, A., D.K. Chang, L. Ricciardiello, C. Gasche, and C.R. Boland. 2003. A novel mechanism  
718 for aspirin-mediated growth inhibition of human colon cancer cells. *Clin Cancer Res.*  
719 9:383-390.
- 720 Guillem-Llobat, P., M. Dovizio, A. Bruno, E. Ricciotti, V. Cufino, A. Sacco, R. Grande, S. Alberti,  
721 V. Arena, M. Cirillo, C. Patrono, G.A. FitzGerald, D. Steinhilber, A. Sgambato, and P.  
722 Patrignani. 2016. Aspirin prevents colorectal cancer metastasis in mice by splitting the  
723 crosstalk between platelets and tumor cells. *Oncotarget.* 7:32462-32477.
- 724 Hill, S.A., S. Wilson, and A.F. Chambers. 1988. Clonal heterogeneity, experimental metastatic  
725 ability, and p21 expression in H-ras-transformed NIH 3T3 cells. *Journal of the National*  
726 *Cancer Institute.* 80:484-490.
- 727 Ishida-Takagishi, M., A. Enomoto, N. Asai, K. Ushida, T. Watanabe, T. Hashimoto, T. Kato, L.  
728 Weng, S. Matsumoto, M. Asai, Y. Murakumo, K. Kaibuchi, A. Kikuchi, and M. Takahashi.  
729 2012. The Dishevelled-associating protein Daple controls the non-canonical Wnt/Rac  
730 pathway and cell motility. *Nature communications.* 3:859.

- 731 Johnson, C.C., R.B. Hayes, R.E. Schoen, M.J. Gunter, W.Y. Huang, and P.T. Team. 2010. Non-  
732 steroidal anti-inflammatory drug use and colorectal polyps in the Prostate, Lung,  
733 Colorectal, And Ovarian Cancer Screening Trial. *Am J Gastroenterol.* 105:2646-2655.
- 734 Jones, M.K., H. Wang, B.M. Peskar, E. Levin, R.M. Itani, I.J. Sarfeh, and A.S. Tarnawski. 1999.  
735 Inhibition of angiogenesis by nonsteroidal anti-inflammatory drugs: insight into  
736 mechanisms and implications for cancer growth and ulcer healing. *Nat Med.* 5:1418-  
737 1423.
- 738 Kobayashi, H., T. Michiue, A. Yukita, H. Danno, K. Sakurai, A. Fukui, A. Kikuchi, and M.  
739 Asashima. 2005. Novel Daple-like protein positively regulates both the Wnt/beta-catenin  
740 pathway and the Wnt/JNK pathway in *Xenopus*. *Mechanisms of development.* 122:1138-  
741 1153.
- 742 Larochelle, S. 2016. SYSTEMS BIOLOGY. Protein isoforms: more than meets the eye. *Nat*  
743 *Methods.* 13:291.
- 744 Leitner, L., D. Shaposhnikov, A. Mengel, A. Descot, S. Julien, R. Hoffmann, and G. Posern.  
745 2011. MAL/MRTF-A controls migration of non-invasive cells by upregulation of  
746 cytoskeleton-associated proteins. *Journal of cell science.* 124:4318-4331.
- 747 Lin, C., J. Ear, Y. Pavlova, Y. Mittal, I. Kufareva, M. Ghassemian, R. Abagyan, M. Garcia-  
748 Marcos, and P. Ghosh. 2011. Tyrosine phosphorylation of the Galpha-interacting protein  
749 GIV promotes activation of phosphoinositide 3-kinase during cell migration. *Sci Signal.*  
750 4:ra64.
- 751 Martini, M., A. Gnann, D. Scheickl, B. Holzmann, and K.P. Janssen. 2011. The candidate tumor  
752 suppressor SASH1 interacts with the actin cytoskeleton and stimulates cell-matrix  
753 adhesion. *Int J Biochem Cell Biol.* 43:1630-1640.
- 754 Niavarani, A., T. Herold, Y. Reyat, M.C. Sauerland, T. Buchner, W. Hiddemann, S.K. Bohlander,  
755 P.J. Valk, and D. Bonnet. 2016. A 4-gene expression score associated with high levels  
756 of Wilms Tumor-1 (WT1) expression is an adverse prognostic factor in acute myeloid  
757 leukaemia. *British journal of haematology.* 172:401-411.
- 758 Niikura, N., T. Iwamoto, S. Masuda, N. Kumaki, T. Xiaoyan, M. Shirane, K. Mori, B. Tsuda, T.  
759 Okamura, Y. Saito, Y. Suzuki, and Y. Tokuda. 2012. Immunohistochemical Ki67 labeling  
760 index has similar proliferation predictive power to various gene signatures in breast  
761 cancer. *Cancer Sci.* 103:1508-1512.
- 762 Nitsche, U., R. Rosenberg, A. Balmert, T. Schuster, J. Slotta-Huspenina, P. Herrmann, F.G.  
763 Bader, H. Friess, P.M. Schlag, U. Stein, and K.P. Janssen. 2012. Integrative marker  
764 analysis allows risk assessment for metastasis in stage II colon cancer. *Annals of*  
765 *surgery.* 256:763-771; discussion 771.
- 766 Oshita, A., S. Kishida, H. Kobayashi, T. Michiue, T. Asahara, M. Asashima, and A. Kikuchi.  
767 2003. Identification and characterization of a novel Dvl-binding protein that suppresses  
768 Wnt signalling pathway. *Genes to cells : devoted to molecular & cellular mechanisms.*  
769 8:1005-1017.
- 770 Redwine, W.B., M.E. DeSantis, I. Hollyer, Z.M. Htet, P.T. Tran, S.K. Swanson, L. Florens, M.P.  
771 Washburn, and S.L. Reck-Peterson. 2017. The human cytoplasmic dynein interactome  
772 reveals novel activators of motility. *Elife.* 6.
- 773 Thun, M.J., M.M. Namboodiri, and C.W. Heath, Jr. 1991. Aspirin use and reduced risk of fatal  
774 colon cancer. *N Engl J Med.* 325:1593-1596.

- 775 Tuck, A.B., S.M. Wilson, R. Khokha, and A.F. Chambers. 1991. Different patterns of gene  
776 expression in ras-resistant and ras-sensitive cells. *Journal of the National Cancer*  
777 *Institute*. 83:485-491.
- 778 Voloshanenko, O., G. Erdmann, T.D. Dubash, I. Augustin, M. Metzigg, G. Moffa, C. Hundsrucker,  
779 G. Kerr, T. Sandmann, B. Anchang, K. Demir, C. Boehm, S. Leible, C.R. Ball, H. Glimm,  
780 R. Spang, and M. Boutros. 2013. Wnt secretion is required to maintain high levels of Wnt  
781 activity in colon cancer cells. *Nature communications*. 4:2610.
- 782 Wunsch, H. 1998. COX provides missing link in mechanism of aspirin in colon cancer. *Lancet*.  
783 351:1864.
- 784 Yao, R., Y. Natsume, and T. Noda. 2004. MAGI-3 is involved in the regulation of the JNK  
785 signaling pathway as a scaffold protein for frizzled and Ltap. *Oncogene*. 23:6023-6030.
- 786 Zeller, C., B. Hinzmann, S. Seitz, H. Prokoph, E. Burkhard-Goettges, J. Fischer, B. Jandrig, L.E.  
787 Schwarz, A. Rosenthal, and S. Scherneck. 2003. SASH1: a candidate tumor suppressor  
788 gene on chromosome 6q24.3 is downregulated in breast cancer. *Oncogene*. 22:2972-  
789 2983.
- 790

**FIGURE LEGENDS:**

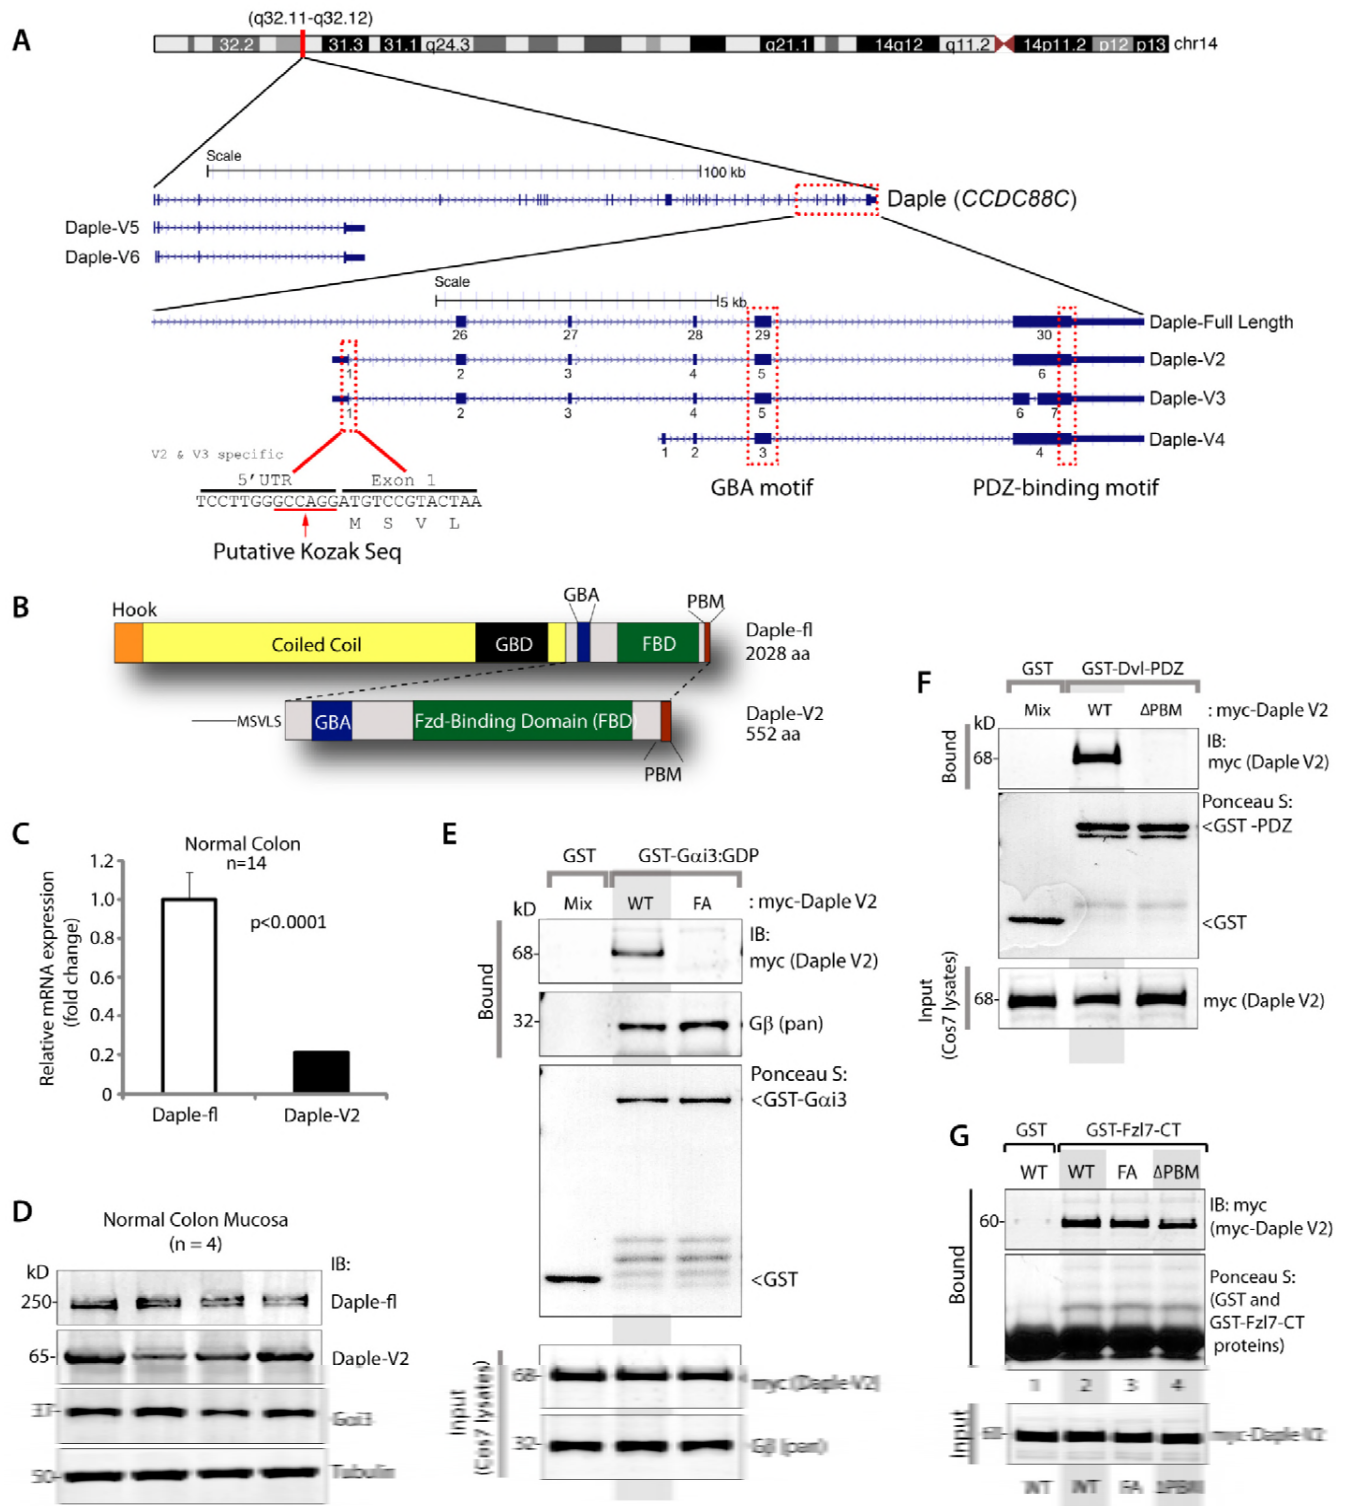

**FIGURE 1**

**Figure 1: Identification and characterization of a short isoform of CCDC88C (Daple-V2) that contains minimal C-terminal modules to bind trimeric Gai, Dvl and Frizzled receptor. (A)** Schematic showing the various N-terminal and C-terminal transcripts of Daple. Various isoforms containing the unique modular C-terminus of the protein are highlighted. All C-terminal transcripts contain an exon coding for a GBA motif and a PDZ-Binding motif. Daple-V2 and Daple-V3 transcripts contain an unique 5' end that is transcribed from an

intronic region between exon 25 and 26 of the full length gene. This 5' end contains exon 1 of Daple-V2 and Daple-V3 and codes for an unique N-terminal peptide on these isoforms. The 5' UTR of the two isoform contains a putative kozak sequence. Names of the RNA transcript and encoded protein is indicated on the right. **(B)** Schematic comparing the domain distribution of Daple-fl and the shorter isoform Daple-V2. **(C)** mRNA isolated from 14 normal colon samples were analyzed for the expression of full length (fl) or short (V2) isoform of Daple. Relative mRNA expression (Y axis) of both isoforms is displayed as bar graphs. **(D)** Whole cell lysates of colonic epithelial from normal subjects were analyzed for Daple, Gai3 and tubulin by immunoblotting (IB). Both full length (fl) and short isoform (V2) were detected. **(E)** Purified, recombinant GST-Gai3 preloaded with GDP and immobilized on glutathione-agarose beads was incubated with cell lysates of Cos7 cells (input) expressing myc-Daple-V2 WT or F194A (FA) as indicated. Bound proteins were analyzed for Daple-V2 (myc) and G $\beta$  by immunoblotting (IB). Equal loading of GST-tagged proteins were confirmed by Ponceau S staining. F194A mutation disrupts binding of Daple-V2 to Gai3. **(F)** Purified, recombinant GST-tagged PDZ domain of Dvl immobilized on glutathione-sepharose beads was incubated with cell lysates of Cos7 cells (input) expressing myc-Daple-V2 WT or delta PBM ( $\Delta$ PBM) as indicated. Bound proteins were analyzed for Daple-V2 (myc) by immunoblotting (IB). Equal loading of GST-tagged proteins was confirmed by Ponceau S staining. Deletion of the C-terminal PDZ-binding motif disrupts binding of Daple-V2 to PDZ domain of Dvl. **(G)** Purified, recombinant GST-tagged carboxy terminus of FZD7R (FzI7-CT) immobilized on glutathione-sepharose beads was incubated with cell lysates of Cos7 cells (input) expressing myc-Daple-V2 WT, FA or delta PBM ( $\Delta$ PBM) as indicated. Bound proteins were analyzed for Daple-V2 (myc) by immunoblotting (IB). Equal loading of GST-tagged proteins was confirmed by Ponceau S staining. WT and mutants of Daple-V2 bound similarly to FZD7R.

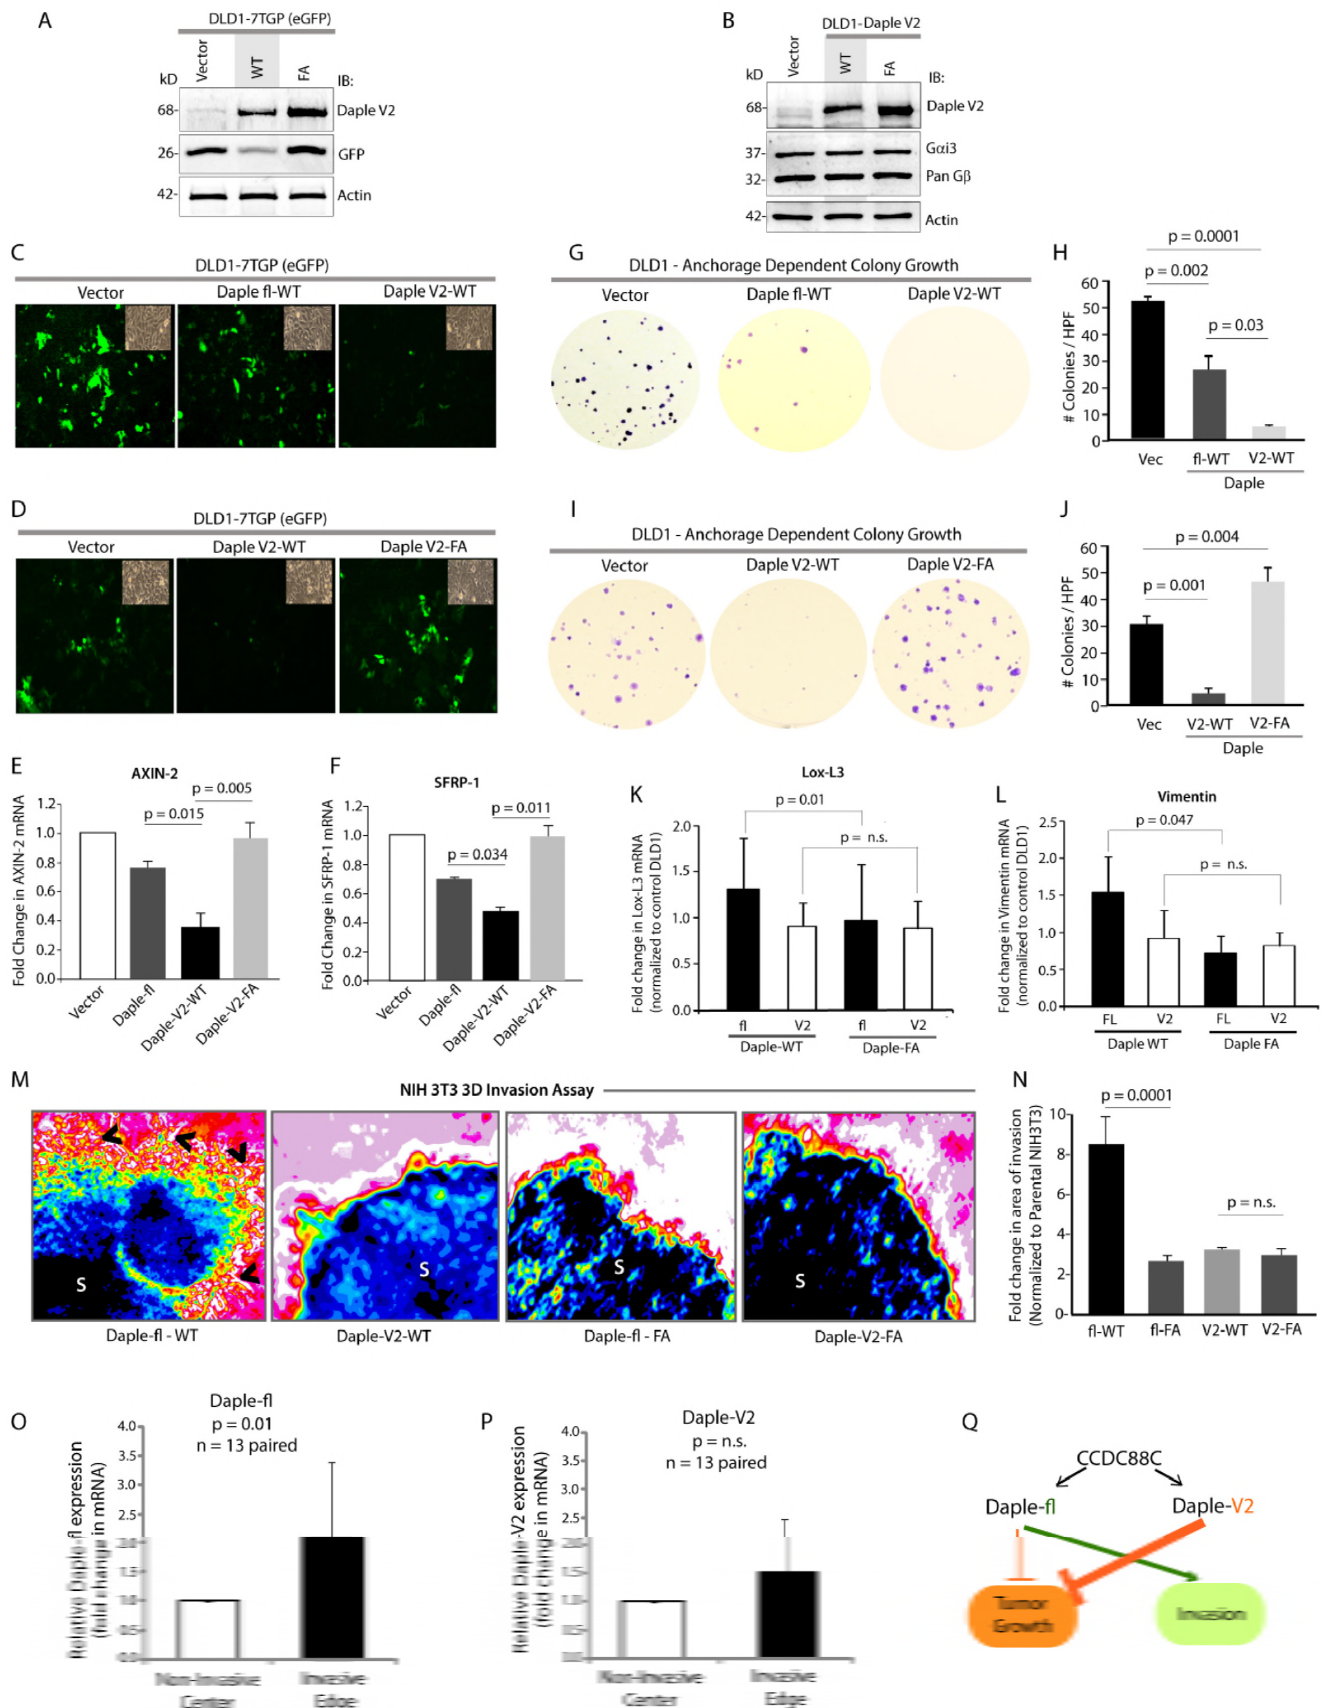

## FIGURE 2

**Figure 2: Daple-V2 is a potent suppressor of the  $\beta$ -Catenin/TCF/LEF pathway and tumor growth but has no effect on EMT or cell invasion. (A)** Whole cell lysates of DLD1 cells stably co-expressing the 7TGP

reporter and either vector control or Daple-V2 were analyzed for Daple-V2, GFP and actin by immunoblotting (IB). The intensity of GFP indicates the extent of  $\beta$ -Catenin/TCF/LEF signals. **(B)** Whole cell lysates of DLD1 cells stably expressing vector control, Daple-V2 WT or FA were analyzed for Daple-V2, Gai3, pan G $\beta$  and actin by immunoblotting (IB). **(C-D)** Monolayers of DLD1 7TGP cell lines in **A** were starved and stimulated with Wnt5a. Images display representative fields analyzed by fluorescence microscopy. The intensity of eGFP signals denotes Wnt transcriptional activity. Insets show representative fields confirming the confluency of the monolayers in each case. In **C**, compared to DLD1 cells expressing vector control, both Daple-fl-WT and Daple-V2-WT showed inhibition of eGFP; inhibition with Daple-V2 was more robust. In **D**, Daple-V2-WT, but not Daple-V2-FA inhibited eGFP. **(E-F)** HeLa cells transfected with myc-Daple constructs as indicated were analyzed for AXIN-2 and SFRP-1 mRNA by qPCR. Results were normalized internally to mRNA levels of the housekeeping gene, GAPDH. Bar graphs display the fold change in each RNA (Y axis) normalized to the expression in cells expressing control vector. Error bars represent mean  $\pm$  S.D of 3 independent experiments. As shown in the case of Daple-fl previously (Aznar et al., eLife 2015), the GBA motif of Daple-V2 is required for suppression of Wnt target genes. **(G-J)** Monolayers of DLD1 cells in **B** were analyzed for their ability to form adherent tumor cell colonies on plastic plates during 2-3 weeks prior to fixation and staining with crystal violet. In panels **G** and **I** photographs of a representative well of the crystal violet-stained 6-well plates are displayed. The number of colonies was counted by ImageJ (Colony counter). In panels **H** and **J** bar graphs display the # of colonies per well (Y axis) seen in each cell line in **G** and **I**, respectively. Panels **G-H** show that both Daple-fl and Daple-V2 can inhibit tumor growth; the latter is more efficient than the former. Panels **I-J** show that the GBA motif of Daple-V2 is required for the inhibition of anchorage-dependent colony growth. **(K-L)** mRNA expression of the EMT markers LOX-L3 and Vimentin were analyzed by qPCR. Results were normalized internally to mRNA levels of the housekeeping gene, GAPDH. Bar graphs display the fold change in each RNA (Y axis) normalized to the expression in cells expressing vector control. Error bars represent mean  $\pm$  S.E.M of 3 independent experiments. Daple-fl, but not Daple-V2 enhances the expression of genes that trigger EMT, and such enhancement requires an intact GBA motif. **(M-N)** Spheroids (S) of NIH3T3 cells expressing WT or FA mutant of myc-Daple-fl or myc-Daple-V2 isoform were analyzed for their ability to invade matrigel in response to Wnt5a using a Cultrex-3D Spheroid Invasion Kit (Trevigen). Representative images of spheroid edges are displayed **(M)**. An increase of invasion tracks (arrowheads) was noted only from the edge of tumor spheroids formed by cells expressing myc-Daple-fl-WT, but not the GEF-deficient F1675A (FA) mutant. Neither the WT nor the FA mutant of Daple-V2 could trigger invasion. Area of invasion was quantified using ImageJ and displayed as bar graphs **(N)**. Error bars representing mean  $\pm$  S.D of 3 independent experiments. **(O-P)** Paired samples from non-invasive center and the invasive edges of colorectal cancers were analyzed for Daple-fl **(O)** and Daple-V2 **(P)** expression by qPCR. Bar graph displays the relative abundance of Daple expression (Y axis). Daple-fl, but not Daple-V2 is increased in the invading margins of tumors compared to the non-invasive tumor cores. Error bars represent mean  $\pm$  S.D. n = 13. **(Q)** Schematic summarizing the effect of the newly discovered GBA motif in Daple-fl and Daple-V2 on tumor growth and tumor invasion. The GBA motif of Daple-fl inhibits tumor growth and enhances tumor invasion, whereas the GBA motif of Daple-V2 exclusively inhibits tumor growth. Red lines = Inhibition. Green lines = Enhancement. Thickness of the lines depicts the relative strength of phenotypes.



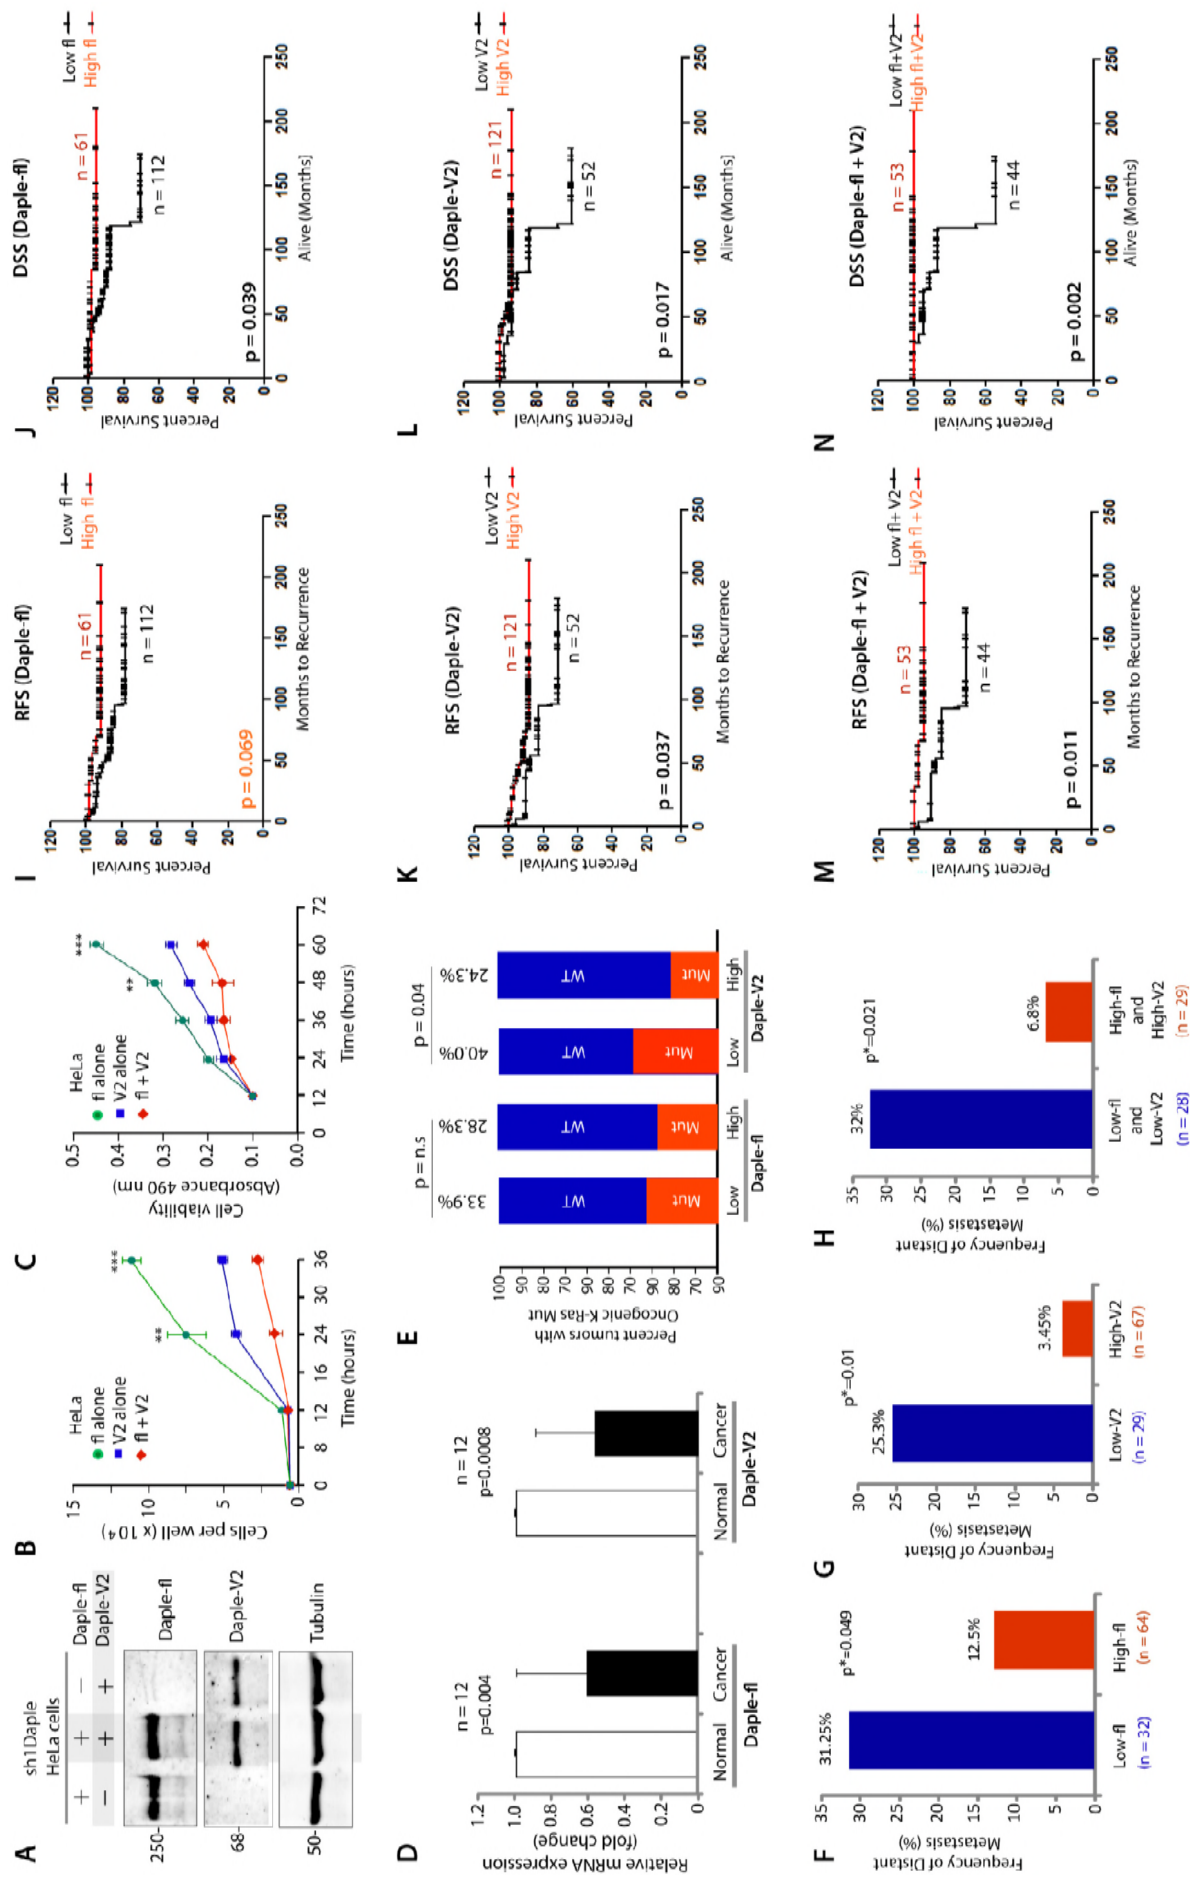

**FIGURE 3**

**Figure 3: The full length (Daple-fl) and short (Daple-V2) isoforms of Daple cooperatively suppress cell proliferation and their low expression in stage II colorectal cancers carries a worse prognosis. (A-C)** HeLa cells depleted of Daple (sh1Daple) stably expressing either Daple-fl alone, or Daple-V2 alone or both were analyzed for Daple expression by immunoblotting **(A)** and rate of cell proliferation assays **(B, C)**. Graphs display the rates of proliferation of various HeLa-GIV cell lines, as determined by cell counting **(B)** and cell viability assays **(C)**. Results are presented as mean  $\pm$  S.E.M;  $n = 3$ . \*\*  $p < 0.01$ ; \*\*\*  $p < 0.001$ . **(D)** Paired colorectal tumors and their adjacent normal tissue were analyzed for relative expression of Daple isoforms by qPCR. Bar graph displays the relative abundance of Daple expression (Y axis). Error bars represent mean  $\pm$  S.D. **(E)** 173 stage II colorectal cancers with known K-Ras mutant status were analyzed for levels of expression of Daple-fl and Daple-V2 mRNA by Taqman qPCR and normalized to GAPDH. Optimal cut-off values for Daple mRNA expression were statistically derived (see detailed "Materials and Methods") to generate subgroups of patients with high or low expression levels. The number of tumors with or without mutant K-Ras that had either low or high expression of Daple isoforms is tabulated in **Figure 3-source data 1**. Bar graphs display the incidence (expressed as %) of K-Ras mutation (Y axis) when either Daple isoforms are either high or low. Red and blue colors indicate whether the tumors harbored oncogenic mutant or WT copy of K-Ras, respectively. The incidence of mutation is displayed on the top of each bar. Tumors with low Daple-V2 had a significant chance that they also harbor mutant K-Ras. No such relationship was seen between levels of expression of Daple-fl and mutant K-Ras. **(F-H)** Bar graphs display the incidence of distant metastasis (as %; Y axis) in stage II colorectal cancers with either low or high levels of expression of Daple-fl alone **(F)**, or Daple-V2 alone **(G)**, or both Daple isoforms **(H)**. **(I-N)** Kaplan-Meier plot of recurrence-free (RFS) and disease-specific (DSS) survival curves of patients with stage II colorectal cancer are stratified by their levels of expression of Daple-fl alone **(I-J)**, or Daple-V2 alone **(K-L)**, or both Daple isoforms **(M-N)**. In the RFS curves, cancers with low Daple-V2 alone exhibited decreased recurrence-free survival **(K)**; significant by Log-Rank test). Although a similar trend was seen also in the case of Daple-fl **(I)**, significance was not reached. Cancers with low levels of both isoforms exhibited decreased recurrence **(M)** with higher significance than each isoform alone. In the DSS curves, cancers with low Daple-fl alone or Daple-V2 alone exhibited decreased disease specific survival **(J, L)**; significant by Log-Rank test). Cancers with low levels of both isoforms exhibited decreased survival **(N)** with higher significance than each isoform alone.

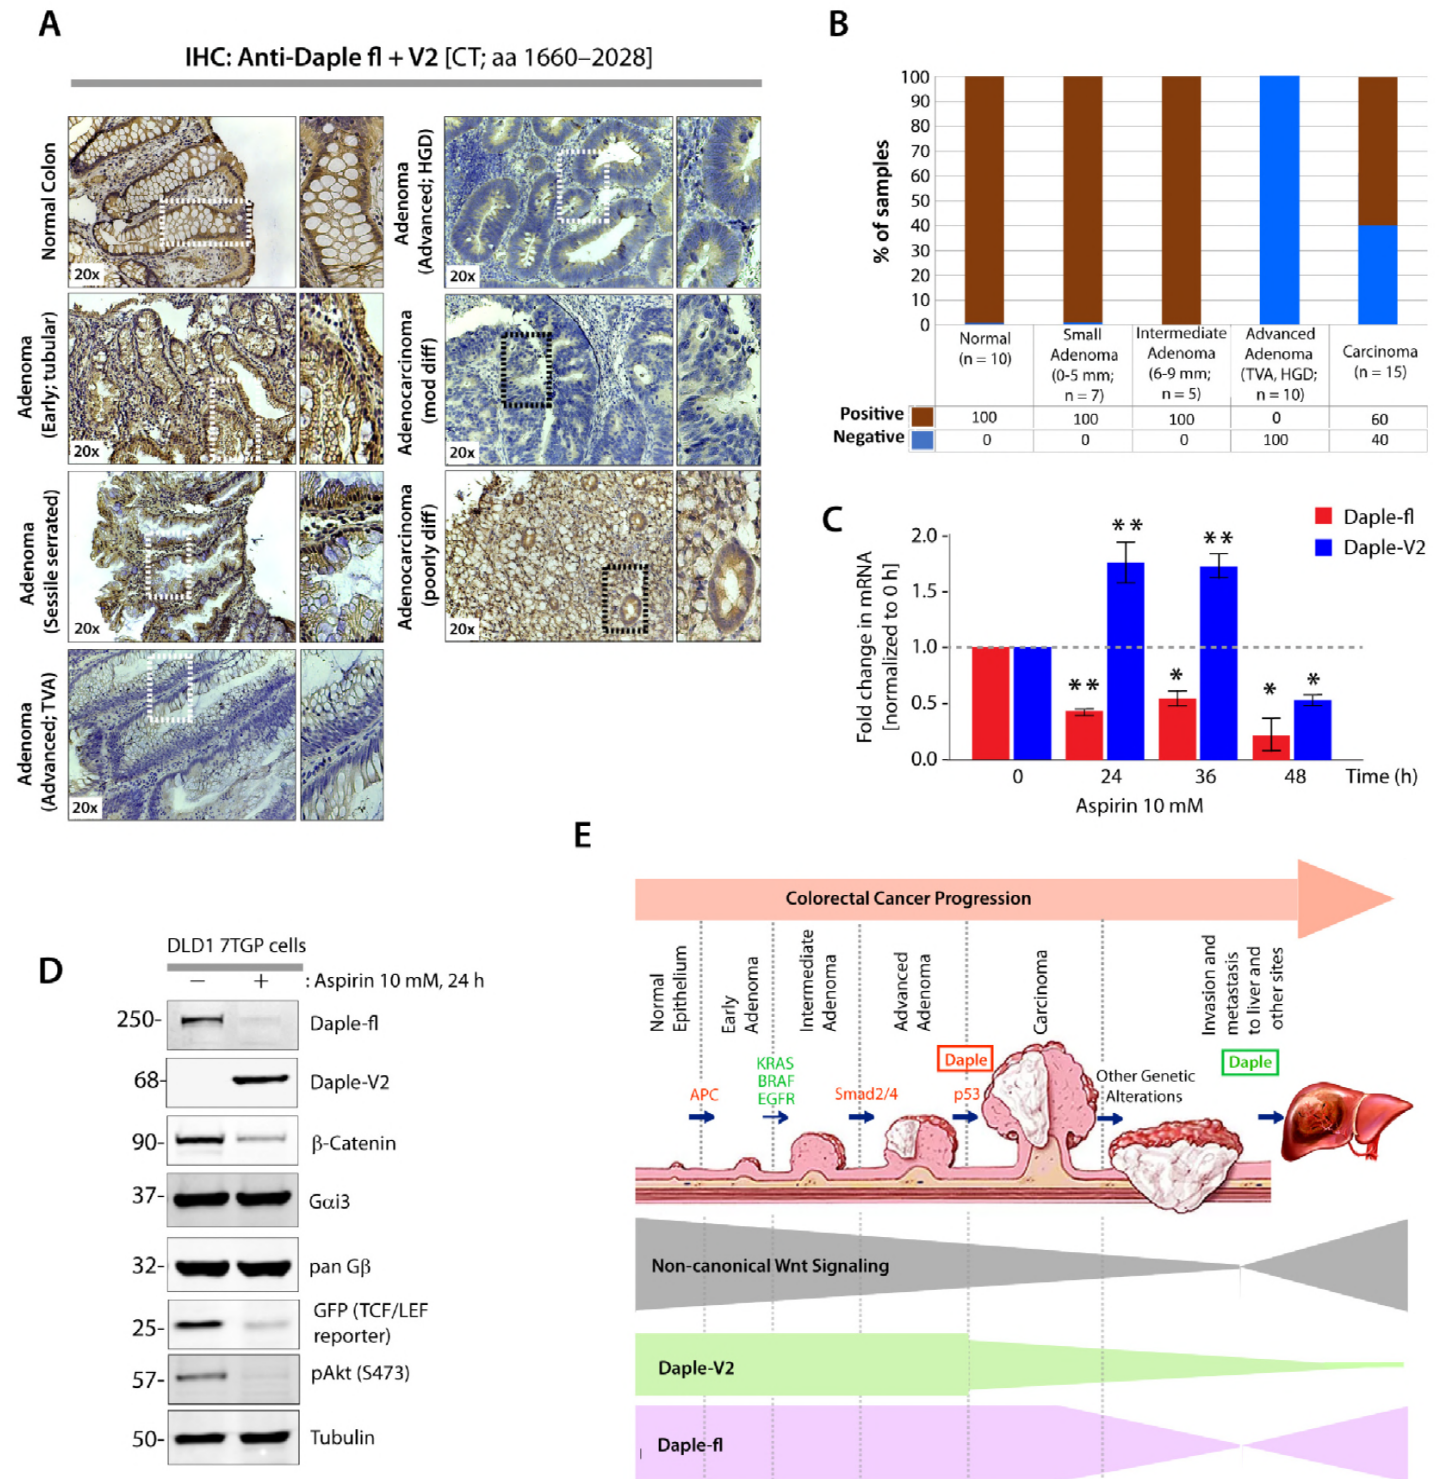

**Figure 4. Both Daple-fl and Daple-V2 isoforms are downregulated during adenoma-to-carcinoma conversion and their expression is differentially regulated by the chemopreventive drug Aspirin. A-B.** Expression of Daple protein was analyzed in formalin-fixed paraffin embedded human tissues (normal, adenomas and carcinomas) by immunohistochemistry (IHC) using anti-Daple-CT antibody that can detect both Daple-fl and Daple-V2 isoforms. Left: Representative tissues from each stained category are shown. Brown = positive stain. Right: Bar graphs display the proportion of samples in each category that stained positive vs. negative. **C.** Parental DLD1 cells were analyzed for Daple-fl and Daple-V2 mRNA by qPCR at indicated time

points after exposure to 10 mM Aspirin. Bar graphs display the fold change in each mRNA (Y axis) normalized to the expression levels at 0h. Error bars represent mean  $\pm$  S.E.M of 3 independent experiments.  $p$  values: \* =  $<0.05$ ; \*\*  $< 0.01$ . **D.** Immunoblots showing the impact of low dose Aspirin on endogenous Daple isoforms expressed by DLD1-7TGP cells.  $\beta$ -Catenin and GFP were assessed as positive controls; the abundance of GFP serves as a surrogate marker for the transcriptional activity of  $\beta$ -Catenin via the TCF/LEF axis. G proteins, G $\alpha$  and  $\beta$ -subunits were assessed as negative controls. **E.** Schematic summarizing profile of expression of Daple-fl and Daple-V2 isoforms during cancer initiation and metastatic progression in the colon. Upper: Various steps and histopathological stages of colorectal cancer progression are shown. Major genetic mutations/ deletions of key genes that herald the step-wise progression are indicated. Daple (both Daple-fl and Daple-V2) are decreased during adenoma to carcinoma progression (red box). Later, during cancer progression and systemic dissemination, total levels of Daple go up (green box), largely owing to an upregulation of its full-length (Daple-fl) transcript. Lower: Changes in the profile of expression of both Daple isoforms (Daple V2 = green; Daple-fl = purple) and their relationship to the previously identified patterns of non-canonical Wnt signaling (gray) is shown. CRC progression image courtesy of Johns Hopkins Digestive Disorders Library.

## TABLES and LEGENDS

|                                 | Low Daple-fl | High Daple-fl |
|---------------------------------|--------------|---------------|
| <b>Oncogenic K-Ras Mutation</b> | 37           | 15            |
| <b>Wild-Type K-Ras</b>          | 72           | 38            |

|                                 | Low Daple-V2 | High Daple-V2 |
|---------------------------------|--------------|---------------|
| <b>Oncogenic K-Ras Mutation</b> | 22           | 30            |
| <b>Wild-Type K-Ras</b>          | 33           | 93            |

**Table 1:** Contingency analysis (Fisher's exact test) comparing Daple-fl or Daple-V2 expression and the presence of wild-type (WT) or oncogenic K-Ras mutation in 173 stage II colorectal carcinomas.

|                             | Ki67 Index    | Osteopontin | SASH1         | MACC1   | Age     | Tumor length (cm) | Tumor differentiation | Grading  |
|-----------------------------|---------------|-------------|---------------|---------|---------|-------------------|-----------------------|----------|
| <b>Daple-V2</b>             |               |             |               |         |         |                   |                       |          |
| <b>r-value</b>              | -0.1794       | -0.01889    | 0.2041        | -0.1462 | 0.05122 | 0.01046           | -0.04673              | 0.02109  |
| <b>P value (two-tailed)</b> | <b>0.0245</b> | 0.8063      | <b>0.0074</b> | 0.0564  | 0.5059  | 0.892             | 0.5439                | 0.7842   |
| <b>Daple-fl</b>             |               |             |               |         |         |                   |                       |          |
| <b>r-value</b>              | 0.04645       | -0.03408    | 0.1224        | -0.1131 | 0.02617 | 0.007986          | -0.06434              | -0.00821 |
| <b>P value (two-tailed)</b> | 0.561         | 0.6553      | 0.1077        | 0.1373  | 0.7325  | 0.917             | 0.4004                | 0.9147   |

**Table 2:** Pearson's correlation comparing Daple-fl or Daple-V2 expression and several tumor markers or histopathological parameters in 173 stage II colorectal carcinomas. Significant correlations are highlighted in red font. Daple-V2 showed significant negative correlation with Ki67 mitotic index and significant positive correlations with tumor suppressor SASH1 and serum levels of carcinoembryonic antigen (CEA).
